# Supplementary material for: Snacking Behaviour and Its Determinants among College-Going Students in Coastal South India
Source: J Nutr Metab. 2018 Apr 18;2018:6785741. doi: 10.1155/2018/6785741 (PMC5932424; doi:10.1155/2018/6785741)
Supplement: Supplementary Materials — The data file includes the variables incorporated in this study. [file 6785741.f1.xlsx]

## Sheet: Sheet1
serial_n	age	mgment	sex	course	poorsnack	snacks_i	times_do	time_of	snack_th	tend_to	meal_ten	parents	prefer_s	reason	include	exercise	prefer_n	agegrp	drinks2	freqsnac	predomdiet	course3	clusterID
1	20	Govt	females	Non-science sstream	no	no				no		no	no		yes	daily	no	20-22 years	non aerated	once a day	predominantly veg	non-science	GFGCM
2	19	Govt	females	Non-science sstream	no	no				no		yes	yes	tastier	yes	never	yes	17-19 years	non aerated	once a day	predominantly veg	non-science	GFGCM
3	20	Govt	females	Non-science sstream	no	no				no		no	no			daily	no	20-22 years	non aerated	once a day	predominantly veg	non-science	GFGCM
4	19	Govt	females	Non-science sstream	no	no				no		no	yes	to loose weight		weekly	no	17-19 years	non aerated	once a day	predominantly veg	non-science	GFGCM
5	18	Govt	male	Non-science sstream	no	no				yes	dinner	yes	yes	to loose weight	yes	daily	yes		non aerated	twice or more per day	predominantly veg	non-science	GFGCM
6	19	Govt	male	Non-science sstream	yes	yes	thrice a day	tea time	while studying	yes	lunch	yes	yes	tastier	yes	daily	yes	17-19 years	non aerated	twice or more per day	pre dominantly non veg	non-science	GFGCM
7	20	Govt	male	Non-science sstream	no	no				yes	more than one	no	yes	to loose weight		weekly	yes	20-22 years	non aerated	once a day	pre dominantly non veg	non-science	GFGCM
8	18	Govt	females	Non-science sstream	no	no				no		no	yes	tastier		daily	no	17-19 years	non aerated	once a day	predominantly veg	non-science	GFGCM
9	19	Govt	females	Non-science sstream	yes	yes	twice a day	tea time	while watching tv	yes	dinner	no	no		no	daily	no	17-19 years	non aerated	twice or more per day	predominantly veg	non-science	GFGCM
10	19	Govt	females	Non-science sstream	yes	yes	once a day	mid morning	while watching tv	yes	lunch	yes	yes	tastier	yes	daily		17-19 years	non aerated	once a day	predominantly veg	non-science	GFGCM
11	18	Govt	females	Non-science sstream	no	no				no		no	yes	tastier	yes	daily	no	17-19 years	non aerated	once a day	predominantly veg	non-science	GFGCM
12	19	Govt	male	Non-science sstream	no	no				yes	breakfast	no	yes	tastier	yes	never	yes	17-19 years	non aerated	twice or more per day	pre dominantly non veg	non-science	GFGCM
13	20	Govt	male	Non-science sstream	no	no				yes	lunch	yes	yes	tastier	yes	daily	yes	20-22 years	non aerated	twice or more per day	predominantly veg	non-science	GFGCM
14	20	Govt	male	Non-science sstream	no	no				yes	dinner	no	yes	to loose weight		weekly	yes	20-22 years	non aerated	twice or more per day	pre dominantly non veg	non-science	GFGCM
15	19	Govt	females	Non-science sstream	yes	yes	can't say	tea time	while studying	no		no	yes	tastier	yes	daily	yes	17-19 years	non aerated	twice or more per day	predominantly veg	non-science	GFGCM
16	18	Govt	females	Non-science sstream	no	no				yes	breakfast	no	yes	to loose weight	yes	never		17-19 years	non aerated	twice or more per day	pre dominantly non veg	non-science	GFGCM
17	18	Govt	females	Non-science sstream	yes	yes	twice a day	tea time	while watching tv	no		no	yes	tastier	no	daily	no	17-19 years	non aerated	twice or more per day	pre dominantly non veg	non-science	GFGCM
18	18	Govt	females	Non-science sstream	yes	yes	twice a day	tea time	while watching tv	yes	dinner	no	yes	tastier	no	daily		17-19 years	non aerated	twice or more per day	pre dominantly non veg	non-science	GFGCM
19	19	Govt	females	Non-science sstream	no	no				no		no	no			daily	no	17-19 years	non aerated	once a day	predominantly veg	non-science	GFGCM
20	20	Govt	females	Non-science sstream	no	no				yes	lunch	no	no		no	never	yes	20-22 years	non aerated	once a day	pre dominantly non veg	non-science	GFGCM
21	20	Govt	females	Non-science sstream	no	no				no		no	yes	tastier	yes	never	yes	20-22 years	non aerated	twice or more per day	predominantly veg	non-science	GFGCM
22	19	Govt	females	Non-science sstream	no	no				no		no	yes	tastier	yes	never	yes	17-19 years	non aerated	twice or more per day	predominantly veg	non-science	GFGCM
23	19	Govt	females	Non-science sstream	no	no				no		no	yes	tastier	yes	never	yes	17-19 years	non aerated	twice or more per day	predominantly veg	non-science	GFGCM
24	19	Govt	females	Non-science sstream	no	no				no		no	yes	tastier	no	daily	yes	17-19 years	non aerated	once a day	predominantly veg	non-science	GFGCM
25	19	Govt	females	Non-science sstream	yes	yes	can't say	tea time	while studying	no		no	yes	tastier	yes	weekly	yes	17-19 years	non aerated	twice or more per day	predominantly veg	non-science	GFGCM
26	20	Govt	females	Non-science sstream	no	no				no		no	yes	tastier	no	weekly	yes	20-22 years	non aerated	twice or more per day	predominantly veg	non-science	GFGCM
27	19	Govt	females	Non-science sstream	no	no				no		yes	yes	tastier	yes	never	yes	17-19 years	non aerated	twice or more per day	predominantly veg	non-science	GFGCM
28	19	Govt	females	Non-science sstream	no	no				no		no	yes	tastier	no	daily	yes	17-19 years	non aerated	once a day	predominantly veg	non-science	GFGCM
29	20	Govt	females	Non-science sstream	no	no				no		yes	yes	tastier	no	never	yes	20-22 years	non aerated	once a day	predominantly veg	non-science	GFGCM
30	19	Govt	male	Non-science sstream	no	no				yes	lunch	yes			yes	daily	no	17-19 years	non aerated	twice or more per day	predominantly veg	non-science	GFGCM
31	21	Govt	male	Non-science sstream	no	no				no		no	yes	tastier	yes	daily	yes	20-22 years	non aerated	twice or more per day	pre dominantly non veg	non-science	GFGCM
32	18	Govt	male	Non-science sstream	yes	yes	thrice a day	post dinner	others	no		yes	yes	more convenient	yes	daily	no	17-19 years	non aerated	twice or more per day	predominantly veg	non-science	GFGCM
33	19	Govt	male	Non-science sstream	yes	yes	twice a day	post dinner	others	yes	lunch	no	no		yes	daily	yes	17-19 years	non aerated	twice or more per day	predominantly veg	non-science	GFGCM
34	18	Govt	females	Science stream	no	no				no		no	no		yes	weekly	no	17-19 years	non aerated	once a day	predominantly veg	science	GFGCM
35	18	Govt	females	Science stream	yes	yes	once a day	tea time	others	no		no	no		yes	daily	no	17-19 years	non aerated	once a day	pre dominantly non veg	science	GFGCM
36	18	Govt	females	Science stream	yes	yes	once a day	tea time	hanging out with frds	yes	lunch	no	no		no	daily	yes	17-19 years	non aerated	once a day	predominantly veg	science	GFGCM
37	20	Govt	females	Science stream	no	no				no		no	no		yes	never	yes	20-22 years	non aerated	once a day	pre dominantly non veg	science	GFGCM
38	19	Govt	females	Science stream	no	no				no		no	no		yes	never	no	17-19 years	non aerated	once a day	pre dominantly non veg	science	GFGCM
39	18	Govt	females	Science stream	yes	yes	once a day	tea time	while watching tv	no		no	no		yes	daily	yes	17-19 years	non aerated	once a day	predominantly veg	science	GFGCM
40	20	Govt	male	Science stream	no	no				no		no	no		no	never	yes	20-22 years	non aerated	twice or more per day	predominantly veg	science	GFGCM
41	20	Govt	females	Science stream	no	no				no		no	no		yes	never	yes	20-22 years	non aerated	once a day	pre dominantly non veg	science	GFGCM
42	17	Govt	females	Science stream	no	no				no		yes	yes	tastier	no	daily	no	17-19 years	non aerated	once a day	predominantly veg	science	GFGCM
43	20	Govt	females	Science stream	no	no				yes	breakfast	no	no		no	weekly	yes	20-22 years	non aerated	once a day	pre dominantly non veg	science	GFGCM
44	21	Govt	male	Science stream	no	no				no		no	no		no	daily	no	20-22 years	non aerated	twice or more per day	predominantly veg	science	GFGCM
45	18	Govt	male	Science stream	no	no				no		no	no		no		yes	17-19 years	non aerated	twice or more per day	pre dominantly non veg	science	GFGCM
46	19	Govt	females	Science stream	no	no				yes		no	no		yes	weekly	yes	17-19 years	non aerated	once a day	predominantly veg	science	GFGCM
47	18	Govt	females	Non-science sstream	no	no				no		no	no		yes	weekly	yes	17-19 years	non aerated	twice or more per day	predominantly veg	non-science	GFGCM
48	19	Govt	male	Non-science sstream	yes	yes	thrice a day	tea time	while watching tv	no		no	no		yes	daily	yes	17-19 years	non aerated	twice or more per day	pre dominantly non veg	non-science	GFGCM
49	20	Govt	male	Non-science sstream	no	no				yes	breakfast	yes	no		no	weekly	yes	20-22 years	non aerated	twice or more per day	pre dominantly non veg	non-science	GFGCM
50	19	Govt	male	Non-science sstream	no	no				no		no	no		yes	daily	yes	17-19 years	non aerated	twice or more per day	predominantly veg	non-science	GFGCM
51	18	Govt	females	Non-science sstream	no	no				yes	breakfast	no	no		yes	daily	yes	17-19 years	non aerated	once a day	predominantly veg	non-science	GFGCM
52	19	Govt	females	Non-science sstream	no	no				yes		no	no		no	never	yes	17-19 years	non aerated	once a day	predominantly veg	non-science	GFGCM
53	19	Govt	females	Non-science sstream	no	no				no		no	no		yes	never	yes	17-19 years	non aerated	twice or more per day	predominantly veg	non-science	GFGCM
54	19	Govt	females	Non-science sstream	no	no				no		no	no		no	never	yes	17-19 years	non aerated	twice or more per day	pre dominantly non veg	non-science	GFGCM
55	19	Govt	females	Non-science sstream	no	no				no		no	no		yes	weekly	yes	17-19 years	non aerated	twice or more per day	predominantly veg	non-science	GFGCM
56	19	Govt	females	Non-science sstream	no	no				no		no	no		yes	never	yes	17-19 years	non aerated	twice or more per day	pre dominantly non veg	non-science	GFGCM
57	19	Govt	females	Non-science sstream	no	no				no		no	no		yes	never	yes	17-19 years	non aerated	twice or more per day	pre dominantly non veg	non-science	GFGCM
58	19	Govt	females	Non-science sstream	yes	yes	can't say		while watching tv	no		no	no		yes	daily	yes	17-19 years	non aerated	twice or more per day	predominantly veg	non-science	GFGCM
59	20	Govt	females	Non-science sstream	yes	yes	once a day	tea time	others	yes	dinner	no	no		yes	never	no	20-22 years	non aerated	once a day	pre dominantly non veg	non-science	GFGCM
60	23	Govt	male	Non-science sstream	no	no				no		no	no		no	weekly	no	23-25 years	non aerated	once a day	pre dominantly non veg	non-science	GFGCM
61	19	Govt	male	Non-science sstream	no	no				no		no	no		no	daily	yes	17-19 years	non aerated	twice or more per day	pre dominantly non veg	non-science	GFGCM
62	20	Govt	male	Non-science sstream	no	no				no		no	no		no	daily	no	20-22 years	non aerated	twice or more per day	pre dominantly non veg	non-science	GFGCM
63	19	Govt	male	Non-science sstream	no	no				no		no	yes	more convenient		daily	no	17-19 years	non aerated	twice or more per day	pre dominantly non veg	non-science	GFGCM
64	23	Govt	females	Non-science sstream	yes	yes	twice a day	tea time	while watching tv	yes	dinner	no	yes	tastier	yes	never	no	23-25 years	non aerated	twice or more per day	pre dominantly non veg	non-science	GFGCM
65	18	Govt	females	Non-science sstream	no	no				yes	dinner	no	no		yes	daily	yes	17-19 years	non aerated	once a day	predominantly veg	non-science	GFGCM
66	18	Govt	male	Non-science sstream	no	no				no		no	no		yes	daily	no	17-19 years	non aerated	twice or more per day	pre dominantly non veg	non-science	GFGCM
67	18	Govt	females	Non-science sstream	no	no				yes	dinner	no	yes	more convenient	no	weekly	no	17-19 years	non aerated	twice or more per day	pre dominantly non veg	non-science	GFGCM
68	20	Govt	male	Non-science sstream	no	no				yes	lunch	no	yes	to loose weight	yes	daily	yes	20-22 years	non aerated	twice or more per day	pre dominantly non veg	non-science	GFGCM
69	19	Govt	male	Non-science sstream	no	no				no		no	no		no	weekly	no	17-19 years	aerated	twice or more per day	pre dominantly non veg	non-science	GFGCM
70	19	Govt	females	Non-science sstream	no	no				yes	dinner	no	no		yes	daily	yes	17-19 years	non aerated	once a day	predominantly veg	non-science	GFGCM
71	19	Govt	male	Non-science sstream	no	no				yes	breakfast	no	no		no	weekly	yes	17-19 years	non aerated	twice or more per day	pre dominantly non veg	non-science	GFGCM
72	19	Govt	male	Non-science sstream	no	no				no		no	no			daily	no	17-19 years	non aerated	twice or more per day	pre dominantly non veg	non-science	GFGCM
73	22	Govt	male	Non-science sstream	no	no				no		no	no		yes	weekly		20-22 years	non aerated	twice or more per day	predominantly veg	non-science	GFGCM
74	19	Govt	male	Non-science sstream	yes	yes	twice a day	post dinner	while studying	yes	lunch	yes	no		yes	daily	yes	17-19 years	non aerated	twice or more per day	predominantly veg	non-science	GFGCM
75	19	Govt	male	Non-science sstream	yes	yes	once a day	tea time	while watching tv	no		no	yes	tastier	no	daily	yes	17-19 years	non aerated	once a day	pre dominantly non veg	non-science	GFGCM
76	19	Govt	male	Non-science sstream	no	no				yes	lunch	yes	no		yes	daily		17-19 years	non aerated	twice or more per day	predominantly veg	non-science	GFGCM
77	18	Govt	male	Non-science sstream	yes	yes	once a day	tea time	while watching tv	yes	lunch	no	yes	tastier	yes	weekly	yes	17-19 years	non aerated	once a day	pre dominantly non veg	non-science	GFGCM
78	18	Govt	male	Non-science sstream	yes	yes	once a day	tea time	while watching tv	no		no	no		yes	weekly	yes	17-19 years	non aerated	once a day	pre dominantly non veg	non-science	GFGCM
79	18	Govt	male	Non-science sstream	yes	yes	once a day	tea time	others	no		yes	no		no	daily	yes	17-19 years	non aerated	once a day	predominantly veg	non-science	GFGCM
80	19	Govt	male	Non-science sstream	no	no				yes	dinner	no	no		no	weekly		17-19 years	non aerated	twice or more per day	predominantly veg	non-science	GFGCM
81	19	Govt	females	Non-science sstream	no	no				no		no	no		yes	daily	no	17-19 years	non aerated	once a day	predominantly veg	non-science	GFGCM
82	19	Govt	male	Non-science sstream	no	no				no		no	no		yes	daily	yes	17-19 years	non aerated	once a day	predominantly veg	non-science	GFGCM
83	20	Govt	male	Non-science sstream	yes	yes	can't say	mid morning	while watching tv	yes	lunch	no	yes	tastier	yes	never	yes	20-22 years	aerated	twice or more per day	pre dominantly non veg	non-science	GFGCM
84	21	Govt	male	Non-science sstream	no	no				no		yes	no		yes	weekly	yes	20-22 years	non aerated	once a day	predominantly veg	non-science	GFGCM
85	21	Govt	females	Science stream	no	no				yes	breakfast	no	no		yes	daily	yes	20-22 years	non aerated	once a day	predominantly veg	science	GFGCM
86	19	Govt	females	Science stream	yes	yes	twice a day	tea time	hanging out with frds	yes	lunch	yes	no		yes	weekly	yes	17-19 years	non aerated	twice or more per day	predominantly veg	science	GFGCM
87	19	Govt	females	Science stream	no	no				no		no						17-19 years	non aerated	once a day	predominantly veg	science	GFGCM
88	19	Govt	females	Science stream	no	no				yes	breakfast	yes	yes	tastier	yes	daily	yes	17-19 years	non aerated	twice or more per day	pre dominantly non veg	science	GFGCM
89	18	Govt	females	Science stream	no	no				no		yes	yes	tastier	yes	never	yes	17-19 years	non aerated	once a day	predominantly veg	science	GFGCM
90	19	Govt	females	Science stream	no	no				no		no	yes		yes	weekly	no	17-19 years	non aerated	twice or more per day	predominantly veg	science	GFGCM
91	19	Govt	females	Science stream	yes	yes	once a day	tea time	while studying	yes	dinner	no	no		no	never		17-19 years	non aerated	once a day	pre dominantly non veg	science	GFGCM
92	20	Govt	females	Science stream	no	no				no		no	no		yes	weekly	no	20-22 years	non aerated	once a day	predominantly veg	science	GFGCM
93	19	Govt	females	Science stream	no	no				no		no	no					17-19 years	non aerated	twice or more per day	predominantly veg	science	GFGCM
94	18	Govt	females	Science stream	no	no				no		no	yes	tastier	yes	weekly	yes	17-19 years	non aerated	once a day	predominantly veg	science	GFGCM
95	20	Govt	females	Science stream	no	no				no		no	no		yes	weekly	yes	20-22 years	non aerated	once a day	pre dominantly non veg	science	GFGCM
96	20	Govt	females	Science stream	no	no				no		no	no		yes	weekly	yes	20-22 years	non aerated	once a day	pre dominantly non veg	science	GFGCM
97	19	Govt	females	Non-science sstream	no	no				yes	breakfast	yes	yes	tastier	yes	never	no	17-19 years	non aerated	twice or more per day	pre dominantly non veg	non-science	GFGCM
98	18	Govt	females	Non-science sstream	no	no				yes	dinner	yes	yes		no	daily	yes	17-19 years	non aerated	once a day	pre dominantly non veg	non-science	GFGCM
99	19	Govt	females	Non-science sstream	yes	yes	thrice a day	tea time	others	no		no	yes	tastier	yes	never	no	17-19 years	non aerated	twice or more per day	pre dominantly non veg	non-science	GFGCM
100	18	Govt	females	Non-science sstream	yes	yes	thrice a day	tea time	hanging out with frds	yes	more than one	yes	yes	tastier	yes	never	yes	17-19 years	non aerated	twice or more per day	pre dominantly non veg	non-science	GFGCM
101	19	Govt	females	Non-science sstream	yes	yes	once a day	tea time	while watching tv	no		no	no			weekly	no	17-19 years	non aerated	once a day	predominantly veg	non-science	GFGCM
102	19	Govt	females	Non-science sstream	no	no				yes	lunch	yes	no		no	weekly	no	17-19 years	non aerated	once a day	pre dominantly non veg	non-science	GFGCM
103	19	Govt	females	Non-science sstream	no	no				yes	lunch	yes	yes	more convenient	yes	never	yes	17-19 years	non aerated	twice or more per day	pre dominantly non veg	non-science	GFGCM
104	19	Govt	females	Non-science sstream	no	no				yes		yes	yes	tastier		weekly		17-19 years	non aerated	twice or more per day	pre dominantly non veg	non-science	GFGCM
105	19	Govt	females	Non-science sstream	no	no				yes	dinner	yes	yes	tastier	yes	weekly	no	17-19 years	non aerated	twice or more per day	predominantly veg	non-science	GFGCM
106	19	Govt	females	Non-science sstream	yes	yes	twice a day	tea time	while watching tv	no		no	no		yes	never	no	17-19 years	non aerated	twice or more per day	pre dominantly non veg	non-science	GFGCM
107	21	Govt	male	Non-science sstream	yes	yes	twice a day	mid morning	others	yes	dinner	no	no		yes	daily	yes	20-22 years	non aerated	twice or more per day	predominantly veg	non-science	GFGCM
108	20	Govt	male	Non-science sstream	no	no				no		no	no		yes	weekly	yes	20-22 years	non aerated	twice or more per day	pre dominantly non veg	non-science	GFGCM
109	21	Govt	male	Non-science sstream	no	no				no		no	no		yes	weekly	yes	20-22 years	non aerated	twice or more per day	pre dominantly non veg	non-science	GFGCM
110	18	Govt	male	Non-science sstream	no	no				no		yes	yes	more convenient	yes	daily	yes	17-19 years	non aerated	once a day	predominantly veg	non-science	GFGCM
111	19	Govt	females	Non-science sstream	yes	yes	twice a day	tea time	while studying	no		no	no		yes	never	no	17-19 years	aerated	twice or more per day	pre dominantly non veg	non-science	GFGCM
112	19	Govt	females	Non-science sstream	yes	yes	once a day	tea time	while studying	no		no	no		no	never	no	17-19 years	non aerated	once a day	pre dominantly non veg	non-science	GFGCM
113	19	Govt	male	Non-science sstream	no	no				no		yes	yes	more convenient	yes	daily	yes	17-19 years	non aerated	twice or more per day	predominantly veg	non-science	GFGCM
114	20	Govt	male	Non-science sstream	no	no				no		no	no		yes	daily	yes	20-22 years	non aerated	once a day	pre dominantly non veg	non-science	GFGCM
115	19	Govt	male	Non-science sstream	yes	yes	thrice a day	tea time	while watching tv	no		no	yes	tastier	no	daily	no	17-19 years	non aerated	twice or more per day	pre dominantly non veg	non-science	GFGCM
116	19	Govt	male	Non-science sstream	yes	yes	thrice a day	tea time	while watching tv	no		no	no		no	weekly	no	17-19 years	non aerated	twice or more per day	pre dominantly non veg	non-science	GFGCM
117	20	Govt	male	Non-science sstream	no	no				yes	breakfast	no	no		yes	daily		20-22 years	non aerated	once a day	predominantly veg	non-science	GFGCM
118	20	Govt	females	Non-science sstream	yes	yes	thrice a day	pre dinner	while watching tv	no		no	yes	tastier	no	never	yes	20-22 years	non aerated	twice or more per day	predominantly veg	non-science	GFGCM
119	19	Govt	females	Non-science sstream	yes	yes	once a day	mid morning	others	yes	more than one	yes	yes	to loose weight	no	daily	no	17-19 years	non aerated	once a day	predominantly veg	non-science	GFGCM
120	19	Govt	male	Non-science sstream	no	no				no		no	no		no	weekly	no	17-19 years	non aerated	twice or more per day	predominantly veg	non-science	GFGCM
121	18	Govt	male	Non-science sstream	yes	yes	can't say	tea time	others	no		yes	no		no	never	no	17-19 years	non aerated	twice or more per day	pre dominantly non veg	non-science	GFGCM
122	18	Govt	male	Non-science sstream	no	no				yes	breakfast	yes	no		no	daily	yes	17-19 years	non aerated	twice or more per day	pre dominantly non veg	non-science	GFGCM
123	20	Govt	females	Non-science sstream	no	no				yes	dinner	yes	no		no	never	yes	20-22 years	non aerated	once a day	predominantly veg	non-science	GFGCM
124	19	Govt	male	Non-science sstream	no	no				no		yes	no		yes	never	yes	17-19 years	non aerated	twice or more per day	pre dominantly non veg	non-science	GFGCM
125	18	Govt	male	Non-science sstream	no	no				no		no	no		yes	daily	no	17-19 years	non aerated	twice or more per day	pre dominantly non veg	non-science	GFGCM
126	20	Govt	male	Non-science sstream	no	no				yes	lunch	no	no		yes	weekly	no	20-22 years	non aerated	once a day	predominantly veg	non-science	GFGCM
127	19	Govt	male	Non-science sstream	no	no				no		no	no		yes	weekly	yes	17-19 years	non aerated	twice or more per day	pre dominantly non veg	non-science	GFGCM
128	20	Govt	male	Non-science sstream	no	no				no		no	no		yes	daily	yes	20-22 years	non aerated	twice or more per day	pre dominantly non veg	non-science	GFGCM
129	19	Govt	male	Non-science sstream	no	no				no		no	no		yes	daily	yes	17-19 years	non aerated	once a day	pre dominantly non veg	non-science	GFGCM
130	20	Govt	male	Non-science sstream	no	no				yes	breakfast	no	no		yes	weekly	yes	20-22 years	non aerated	once a day	pre dominantly non veg	non-science	GFGCM
131	19	Govt	females	Non-science sstream	yes	yes	once a day	tea time	while watching tv	no		no	no		yes	weekly	yes	17-19 years	aerated	once a day	predominantly veg	non-science	GFGCM
132	18	Govt	females	Non-science sstream	no	no				no		no	no		yes	weekly	yes	17-19 years	non aerated	once a day	predominantly veg	non-science	GFGCM
133	19	Govt	females	Non-science sstream	no	no				no		no	no		yes	weekly	yes	17-19 years	non aerated	once a day	predominantly veg	non-science	GFGCM
134	18	Govt	females	Non-science sstream	no	no				yes	breakfast	no	yes	tastier	yes	daily		17-19 years	non aerated	once a day	pre dominantly non veg	non-science	GFGCM
135	18	Govt	females	Non-science sstream	no	no				yes	breakfast	no	yes	tastier	yes	daily	yes	17-19 years	non aerated	once a day	pre dominantly non veg	non-science	GFGCM
136	19	Govt	females	Non-science sstream	no	no				no		no	no		yes	weekly	no	17-19 years	non aerated	once a day	predominantly veg	non-science	GFGCM
137	19	Govt	females	Non-science sstream	yes	yes	once a day	tea time	while watching tv	no		no	no		yes	never	no	17-19 years	non aerated	once a day	predominantly veg	non-science	GFGCM
138	20	Govt	females	Non-science sstream	yes	yes	once a day	tea time	while studying	no		no	no		yes	weekly	yes	20-22 years	non aerated	once a day	predominantly veg	non-science	GFGCM
139	19	Govt	females	Non-science sstream	yes	yes	twice a day	tea time	while watching tv	no		no	no		yes	never	no	17-19 years	non aerated	twice or more per day	predominantly veg	non-science	GFGCM
140	19	Govt	females	Non-science sstream	no	no				yes	lunch	no	no		no	never	no	17-19 years	non aerated	once a day	pre dominantly non veg	non-science	GFGCM
141	19	Govt	females	Non-science sstream	no	no				no		no	no		no	never	no	17-19 years	non aerated	once a day	predominantly veg	non-science	GFGCM
142	19	Govt	male	Non-science sstream	yes	yes	twice a day	tea time	while watching tv	no		no	no		yes	daily	yes	17-19 years	non aerated	twice or more per day	pre dominantly non veg	non-science	GFGCM
143	19	Govt	male	Non-science sstream	yes	yes	twice a day	tea time	while watching tv	no		no	no		yes	daily	yes	17-19 years	non aerated	twice or more per day	pre dominantly non veg	non-science	GFGCM
144	19	Govt	male	Non-science sstream	yes	yes	twice a day	tea time	while watching tv	no		no	no		yes	weekly	yes	17-19 years	non aerated	twice or more per day	pre dominantly non veg	non-science	GFGCM
145	19	Govt	females	Non-science sstream	no	no				yes	breakfast	no	no		yes	daily	yes	17-19 years	non aerated	once a day	pre dominantly non veg	non-science	GFGCM
146	19	Govt	females	Non-science sstream	no	no				yes	lunch	yes	no			daily		17-19 years	non aerated	once a day	pre dominantly non veg	non-science	GFGCM
147	18	Govt	females	Non-science sstream	no	no				no		no	no		yes	never	yes	17-19 years	non aerated	once a day	pre dominantly non veg	non-science	GFGCM
148	18	Govt	females	Non-science sstream	no	no				no		no	no		no	weekly	yes	17-19 years	non aerated	once a day	pre dominantly non veg	non-science	GFGCM
149	18	Govt	females	Non-science sstream	no	no				no		no	no		no	never	yes	17-19 years	non aerated	once a day	pre dominantly non veg	non-science	GFGCM
150	20	Govt	females	Non-science sstream	yes	yes	once a day	tea time	while watching tv	yes	breakfast	no	no		no	weekly	yes	20-22 years	non aerated	once a day	pre dominantly non veg	non-science	GFGCM
151	20	Govt	females	Non-science sstream	no	no				no		no	no		yes	never	yes	20-22 years	non aerated	twice or more per day	pre dominantly non veg	non-science	GFGCM
152	20	Govt	females	Non-science sstream	no	no				no		no	yes	to loose weight	no	never	yes	20-22 years	non aerated	twice or more per day	predominantly veg	non-science	GFGCM
153	20	Govt	females	Non-science sstream	no	no				yes	lunch	no	no		yes	weekly	no	20-22 years	non aerated	once a day	predominantly veg	non-science	GFGCM
154	19	Govt	females	Non-science sstream	no	no				no		yes	yes	tastier	yes	never	yes	17-19 years	non aerated	once a day	pre dominantly non veg	non-science	GFGCM
155	19	Govt	females	Non-science sstream	no	no				yes	lunch	no	yes	tastier	yes	weekly	no	17-19 years	non aerated	once a day	predominantly veg	non-science	GFGCM
156	20	Govt	females	Non-science sstream	no	no				yes	dinner	yes	yes	tastier	yes	daily	yes	20-22 years	non aerated	twice or more per day	pre dominantly non veg	non-science	GFGCM
157	22	Govt	females	Non-science sstream	yes	yes	twice a day	tea time	while studying	yes	lunch	yes	yes	tastier	no	never	no	20-22 years	non aerated	twice or more per day	predominantly veg	non-science	GFGCM
158	20	Govt	male	Non-science sstream	yes	yes	twice a day	tea time	hanging out with frds	yes	more than one	no	yes	more convenient	yes	daily	yes	20-22 years	non aerated	twice or more per day	predominantly veg	non-science	GFGCM
159	20	Govt	females	Non-science sstream	no	no				yes	dinner	no	no		no	never	yes	20-22 years	non aerated	twice or more per day	predominantly veg	non-science	GFGCM
160	18	Govt	females	Non-science sstream	yes	yes	twice a day	tea time	while watching tv	yes	breakfast	yes	no		yes	weekly	yes		non aerated	twice or more per day	pre dominantly non veg	non-science	GFGCM
161	19	Govt	male	Non-science sstream	yes	yes	twice a day	tea time	others	no		no	no		yes	daily	yes	17-19 years	non aerated	twice or more per day	pre dominantly non veg	non-science	GFGCM
162	21	Govt	male	Non-science sstream	yes	yes	twice a day	tea time	others	no		no	no		yes	never	yes	20-22 years	non aerated	twice or more per day	predominantly veg	non-science	GFGCM
163	20	Govt	male	Non-science sstream	yes	yes	twice a day	tea time	while studying	no		no	no		yes	weekly	yes	20-22 years	non aerated	twice or more per day	pre dominantly non veg	non-science	GFGCM
164	21	Govt	male	Non-science sstream	yes	yes	can't say	tea time	while watching tv	yes	lunch	no	no		yes	weekly	yes	20-22 years	non aerated	twice or more per day	pre dominantly non veg	non-science	GFGCM
165	19	Govt	male	Non-science sstream	no	no				no		no	no		yes	daily	no	17-19 years	non aerated	once a day	predominantly veg	non-science	GFGCM
166	20	Govt	females	Non-science sstream	no	no				yes	more than one	no	no		yes	weekly	yes	20-22 years	non aerated	once a day	pre dominantly non veg	non-science	GFGCM
167	20	Govt	male	Non-science sstream	yes	yes	can't say	pre dinner		no		no	no		yes	daily	yes	20-22 years	aerated	twice or more per day	predominantly veg	non-science	GFGCM
168	18	Govt	females	Non-science sstream	yes	yes	can't say	tea time	while studying	no		no	no		yes	never	yes		non aerated	twice or more per day	pre dominantly non veg	non-science	GFGCM
169	20	Govt	male	Non-science sstream	no	no				no		no	no		yes	daily	no	20-22 years	non aerated	twice or more per day	pre dominantly non veg	non-science	GFGCM
170	20	Govt	male	Non-science sstream	no	no				no		no			yes	weekly	no	20-22 years	non aerated	twice or more per day	pre dominantly non veg	non-science	GFGCM
171	20	Govt	females	Non-science sstream	no	no				yes	more than one	yes	no		yes	never	yes	20-22 years	non aerated	twice or more per day	predominantly veg	non-science	GFGCM
172	20	Govt	male	Non-science sstream	yes	yes	can't say	tea time	while watching tv	no		no	no		no	weekly	yes	20-22 years	non aerated	twice or more per day	pre dominantly non veg	non-science	GFGCM
173	20	Govt	male	Non-science sstream	no	no				no		yes	no		no	daily	no	20-22 years	non aerated	once a day	predominantly veg	non-science	GFGCM
174	19	Govt	male	Non-science sstream	no	no				no		no	no		yes	weekly	no	17-19 years	non aerated	twice or more per day	predominantly veg	non-science	GFGCM
175	20	Govt	male	Non-science sstream	no	no				no		no	no		yes	daily		20-22 years	non aerated	twice or more per day	pre dominantly non veg	non-science	GFGCM
176	19	Govt	females	Non-science sstream	yes	yes	can't say	pre dinner	while studying	yes	lunch	yes	yes	tastier	yes	daily	yes	17-19 years	non aerated	twice or more per day	predominantly veg	non-science	GFGC
177	20	Govt	females	Non-science sstream	yes	yes	twice a day	tea time	while watching tv	yes	lunch	no	yes	tastier	yes	never	no	20-22 years	non aerated	twice or more per day	pre dominantly non veg	non-science	GFGC
178	20	Govt	male	Non-science sstream	yes	yes	twice a day	tea time	while watching tv	yes	breakfast	no	yes	tastier	yes	never	yes	20-22 years	non aerated	twice or more per day	predominantly veg	non-science	GFGC
179	20	Govt	male	Non-science sstream	yes	yes	once a day	tea time	others	yes	breakfast	no	yes	more convenient	yes	never	yes	20-22 years	non aerated	once a day	predominantly veg	non-science	GFGC
180	20	Govt	male	Non-science sstream	yes	yes	twice a day	tea time	while studying	yes	more than one	no	yes	to loose weight	yes	weekly	yes	20-22 years	non aerated	twice or more per day	predominantly veg	non-science	GFGC
181	22	Govt	male	Non-science sstream	yes	yes	thrice a day	tea time	while watching tv	yes	dinner	no	yes	to loose weight	no	daily	yes	20-22 years	non aerated	twice or more per day	predominantly veg	non-science	GFGC
182	20	Govt	male	Non-science sstream	yes	yes	twice a day	tea time	hanging out with frds	yes	lunch	no	yes	more convenient	no	daily	no	20-22 years	non aerated	twice or more per day	predominantly veg	non-science	GFGC
183	20	Govt	male	Non-science sstream	yes	yes	once a day	tea time	while watching tv	yes	more than one	yes	yes	to loose weight	yes	weekly	no	20-22 years	non aerated	once a day	predominantly veg	non-science	GFGC
184	20	Govt	male	Non-science sstream	yes	yes	once a day	tea time	while watching tv	yes	breakfast	yes		tastier	no	weekly	yes	20-22 years	aerated	once a day	predominantly veg	non-science	GFGC
185	20	Govt	male	Non-science sstream	yes	yes	thrice a day	tea time	while watching tv	yes	breakfast	no	yes	more convenient	no	daily	no	20-22 years	non aerated	twice or more per day	pre dominantly non veg	non-science	GFGC
186	20	Govt	male	Non-science sstream	yes	yes	once a day	tea time	others	yes	dinner	no	no		yes	daily	yes	20-22 years	non aerated	once a day	predominantly veg	non-science	GFGC
187	20	Govt	male	Non-science sstream	yes	yes	twice a day	tea time	while watching tv	no		no	yes	tastier	no	never	yes	20-22 years	non aerated	twice or more per day	predominantly veg	non-science	GFGC
188	20	Govt	male	Non-science sstream	yes	yes	once a day	tea time	others	yes	breakfast	no	yes	more convenient	no	never	yes	20-22 years	non aerated	once a day	pre dominantly non veg	non-science	GFGC
189	25	Govt	male	Non-science sstream	yes	yes	can't say	mid morning	while studying	yes	lunch	no	no		yes	never	no	23-25 years	non aerated	twice or more per day	pre dominantly non veg	non-science	GFGC
190	21	Govt	male	Non-science sstream	yes	yes	twice a day	pre dinner	while studying	yes	lunch	yes	yes	more convenient	yes	weekly	yes	20-22 years	aerated	twice or more per day	predominantly veg	non-science	GFGC
191	20	Govt	male	Non-science sstream	no	no				yes	breakfast	yes	yes	more convenient	yes	never	yes	20-22 years	non aerated	twice or more per day	predominantly veg	non-science	GFGC
192	20	Govt	male	Non-science sstream	yes	yes	once a day	tea time	while watching tv	yes	breakfast	no	yes	tastier	yes	weekly	no	20-22 years	aerated	once a day	pre dominantly non veg	non-science	GFCG
193	20	Govt	male	Non-science sstream	yes	yes	once a day	tea time	while watching tv	yes	breakfast	no	no		no	weekly	yes	20-22 years	non aerated	once a day	pre dominantly non veg	non-science	GFGC
194	20	Govt	male	Non-science sstream	yes	yes	twice a day	tea time	while watching tv	yes	lunch	no	no		yes	weekly	no	20-22 years	non aerated	twice or more per day	predominantly veg	non-science	GFGC
195	19	Govt	females	Non-science sstream	yes	yes	once a day	tea time	while watching tv	yes	dinner	no	no		yes	never	yes	17-19 years	non aerated	once a day	predominantly veg	non-science	GFGC
196	20	Govt	females	Non-science sstream	yes	yes	twice a day	tea time	while watching tv	yes	dinner	no	yes	tastier	yes	never	no	20-22 years	non aerated	twice or more per day	predominantly veg	non-science	GFGC
197	20	Govt	females	Non-science sstream	yes	yes	twice a day	tea time	hanging out with frds	yes	dinner	no	yes	tastier	yes	weekly	no	20-22 years	non aerated	twice or more per day	predominantly veg	non-science	GFGC
198	20	Govt	females	Non-science sstream	yes	yes	twice a day	tea time	while watching tv	yes	lunch	no	no		no	never	yes	20-22 years	non aerated	twice or more per day	predominantly veg	non-science	GFGC
199	20	Govt	females	Non-science sstream	yes	yes	once a day	tea time	while studying	yes	breakfast	no	no		no	weekly	yes	20-22 years	non aerated	once a day	pre dominantly non veg	non-science	GFGC
200	20	Govt	females	Non-science sstream	no	no				yes	more than one	yes	no		yes	daily	yes	20-22 years	aerated	twice or more per day	predominantly veg	non-science	GFGC
201	19	Govt	females	Non-science sstream	yes	yes	twice a day	tea time	while watching tv	yes	dinner	no	yes	tastier	no	never	yes	17-19 years	non aerated	twice or more per day	pre dominantly non veg	non-science	GFGC
202	20	Govt	male	Non-science sstream	yes	yes	twice a day	tea time	while watching tv	no		no	no		no	never	yes	20-22 years	non aerated	twice or more per day	predominantly veg	non-science	GFGC
203	20	Govt	females	Non-science sstream	yes	yes	twice a day	tea time	while watching tv	yes	more than one	no	no		yes	weekly	no	20-22 years	non aerated	twice or more per day	predominantly veg	non-science	GFGC
204	20	Govt	females	Non-science sstream	yes	yes	twice a day	tea time	while watching tv	yes	more than one	no	no		yes	daily	no	20-22 years	non aerated	twice or more per day	pre dominantly non veg	non-science	GFGC
205	20	Govt	females	Non-science sstream	yes	yes	twice a day	tea time	while watching tv	yes	breakfast	no	no		yes	never	no	20-22 years	non aerated	twice or more per day	pre dominantly non veg	non-science	GFGC
206	19	Govt	females	Non-science sstream	yes	yes	once a day	tea time	while watching tv	yes	dinner	no	no		yes	never	yes	17-19 years	non aerated	once a day	predominantly veg	non-science	GFGC
207	20	Govt	male	Non-science sstream	yes	yes	once a day	tea time	while watching tv	yes	dinner	no	no		yes	weekly	yes	20-22 years	non aerated	once a day	predominantly veg	non-science	GFGC
208	20	Govt	females	Non-science sstream	yes	yes	twice a day	tea time	while watching tv	yes	breakfast	no	no		yes	never	yes	20-22 years	non aerated	twice or more per day	predominantly veg	non-science	GFGC
209	21	Govt	females	Non-science sstream	yes	yes	once a day	tea time	while watching tv	yes	more than one	no	no		yes	daily		20-22 years	non aerated	once a day	pre dominantly non veg	non-science	GFGC
210	20	Govt	females	Non-science sstream	yes	yes	once a day	tea time	others	no		no	no		yes	daily		20-22 years	non aerated	once a day	predominantly veg	non-science	GFGC
211	20	Govt	females	Non-science sstream	yes	yes	twice a day	tea time	while watching tv	yes	more than one	no			yes	daily		20-22 years	non aerated	twice or more per day	predominantly veg	non-science	GFGC
212	19	Govt	females	Non-science sstream	yes	yes	twice a day	tea time	while watching tv	yes	breakfast	yes	no		yes	never	yes	17-19 years	non aerated	twice or more per day	predominantly veg	non-science	GFGC
213	22	Govt	females	Non-science sstream	yes	yes	twice a day	pre dinner	others	yes	dinner	no	no		yes	daily	no	20-22 years	non aerated	twice or more per day	predominantly veg	non-science	GFGC
214	20	Govt	females	Non-science sstream	yes	yes	once a day	tea time	while watching tv	yes	breakfast	yes	no		no	never	no	20-22 years	non aerated	once a day	predominantly veg	non-science	GFGC
215	20	Govt	females	Non-science sstream	yes	yes	once a day	tea time	others	yes	lunch	yes	no		yes	never	yes	20-22 years	non aerated	once a day	predominantly veg	non-science	GFGC
216	20	Govt	females	Non-science sstream	yes	yes	once a day	tea time	while watching tv	yes	more than one	yes	yes	to loose weight	yes	weekly	yes	20-22 years	aerated	once a day	predominantly veg	non-science	GFGC
217	20	Govt	females	Non-science sstream	yes	yes	once a day	tea time	while watching tv	yes	breakfast	no	no		yes	weekly	yes	20-22 years	non aerated	once a day	predominantly veg	non-science	GFGC
218	19	Govt	females	Non-science sstream	yes	yes	thrice a day	tea time	while studying	yes	breakfast	yes	yes	tastier	yes	daily	yes	17-19 years	non aerated	twice or more per day	predominantly veg	non-science	GFGC
219	18	Govt	females	Non-science sstream	yes	yes	thrice a day	tea time	hanging out with frds	yes	breakfast	yes	yes	tastier	yes	daily	yes	17-19 years	non aerated	twice or more per day	pre dominantly non veg	non-science	GFGC
220	17	Govt	females	Non-science sstream	yes	yes	once a day	tea time	while watching tv	yes	breakfast	yes	yes	tastier	no	weekly	yes	17-19 years	non aerated	once a day	pre dominantly non veg	non-science	GFGC
221	18	Govt	females	Non-science sstream	yes	yes	once a day	tea time	while studying	yes	breakfast	yes	yes	tastier	yes	daily	yes	17-19 years	non aerated	once a day	pre dominantly non veg	non-science	GFGC
222	18	Govt	females	Non-science sstream	yes	yes	twice a day	tea time	while studying	yes	dinner	yes	yes	tastier	yes	weekly	yes	17-19 years	non aerated	twice or more per day	predominantly veg	non-science	GFGC
223	17	Govt	females	Non-science sstream	yes	yes	thrice a day	mid morning	while studying	yes	breakfast	yes	yes	tastier	yes	weekly	yes	17-19 years	non aerated	twice or more per day	pre dominantly non veg	non-science	GFGC
224	19	Govt	females	Non-science sstream	yes	yes	thrice a day	mid morning	while studying	yes	breakfast	yes	yes	tastier	no	weekly	yes	17-19 years	non aerated	twice or more per day	pre dominantly non veg	non-science	GFGC
225	17	Govt	females	Non-science sstream	yes	yes	once a day	tea time	while watching tv	yes	breakfast	yes	yes	to loose weight	yes		yes	17-19 years	non aerated	once a day	pre dominantly non veg	non-science	GFGC
226	18	Govt	females	Non-science sstream	yes	yes	once a day	tea time	hanging out with frds	yes	lunch	no	no		no	daily	no	17-19 years	non aerated	once a day	pre dominantly non veg	non-science	GFGC
227	18	Govt	females	Non-science sstream	yes	yes	once a day	tea time	hanging out with frds	yes	lunch	no	yes	to loose weight	yes	daily		17-19 years	non aerated	once a day	pre dominantly non veg	non-science	GFGC
228	17	Govt	females	Non-science sstream	yes	yes	once a day	tea time	while studying	no		no	yes	tastier	yes	daily	no	17-19 years	non aerated	once a day	predominantly veg	non-science	GFGC
229	18	Govt	females	Non-science sstream	yes	yes	once a day	tea time	while studying	yes	lunch	no	yes	tastier	yes	daily	no	17-19 years	non aerated	once a day	predominantly veg	non-science	GFGC
230	18	Govt	females	Non-science sstream	yes	yes	once a day	tea time	while studying	yes	lunch	no	yes	tastier	no	daily	yes	17-19 years	non aerated	once a day	pre dominantly non veg	non-science	GFGC
231	17	Govt	females	Non-science sstream	yes	yes	once a day	tea time	while studying	yes	lunch	no	yes	tastier	yes	daily	no	17-19 years	non aerated	once a day	predominantly veg	non-science	GFGC
232	18	Govt	females	Non-science sstream	yes	yes	once a day	tea time	while studying	yes	breakfast	no	yes	tastier	yes	daily	no	17-19 years	non aerated	once a day	predominantly veg	non-science	GFGC
233	19	Govt	females	Non-science sstream	yes	yes	once a day	tea time	while watching tv	yes	breakfast	no	yes	to loose weight	no	never	yes	17-19 years	non aerated	once a day	pre dominantly non veg	non-science	GFGC
234	18	Govt	females	Non-science sstream	yes	yes	can't say	tea time	while watching tv	yes	breakfast	no	yes	tastier	yes	daily	yes	17-19 years	non aerated	twice or more per day	pre dominantly non veg	non-science	GFGC
235	18	Govt	females	Non-science sstream	yes	yes	once a day	tea time	while watching tv	yes	lunch	no	yes	tastier	yes	weekly	yes	17-19 years	aerated	once a day	pre dominantly non veg	non-science	GFGC
236	18	Govt	females	Non-science sstream	yes	yes	twice a day	pre dinner	while studying	yes	dinner	yes	no		yes	weekly	yes	17-19 years	non aerated	twice or more per day	predominantly veg	non-science	GFGC
237	19	Govt	females	Non-science sstream	yes	yes	once a day	tea time	while studying	yes	dinner	no	yes	to loose weight	yes	never	no	17-19 years	non aerated	once a day	pre dominantly non veg	non-science	GFGC
238	19	Govt	females	Non-science sstream	yes	yes	can't say	tea time	while studying	yes	breakfast	no	yes	to loose weight	no	daily	yes	17-19 years	non aerated	twice or more per day	pre dominantly non veg	non-science	GFGC
239	18	Govt	females	Non-science sstream	yes	yes	can't say	tea time	while studying	yes	breakfast	no	yes	to loose weight	no	daily	yes	17-19 years	non aerated	twice or more per day	pre dominantly non veg	non-science	GFGC
240	21	Govt	females	Non-science sstream	yes	yes	can't say	tea time	while studying	yes	breakfast	no	no		no	daily	yes	20-22 years	non aerated	twice or more per day	pre dominantly non veg	non-science	GFGC
241	19	Govt	females	Non-science sstream	yes	yes	twice a day	tea time	while watching tv	yes	breakfast	yes	yes	tastier	no	never	yes	17-19 years	aerated	twice or more per day	pre dominantly non veg	non-science	GFGC
242	18	Govt	females	Non-science sstream	yes	yes	thrice a day	tea time	while watching tv	yes	breakfast	yes	yes	tastier	no	daily	yes	17-19 years	non aerated	twice or more per day	pre dominantly non veg	non-science	GFGC
243	18	Govt	females	Non-science sstream	yes	yes	can't say	pre dinner	others	yes	more than one	yes	no		no	weekly		17-19 years	non aerated	twice or more per day	pre dominantly non veg	non-science	GFGC
244	18	Govt	females	Non-science sstream	yes	yes	can't say	pre dinner	others	yes	more than one	yes	no		no	never	yes	17-19 years	non aerated	twice or more per day	pre dominantly non veg	non-science	GFGC
245	18	Govt	females	Non-science sstream	yes	yes	can't say	tea time	while watching tv	yes	more than one	yes	yes	tastier	yes	daily	yes	17-19 years	non aerated	twice or more per day	pre dominantly non veg	non-science	GFGC
246	18	Govt	females	Non-science sstream	yes	yes	thrice a day	tea time	while watching tv	yes	dinner	yes	yes	tastier	yes	weekly	yes	17-19 years	non aerated	twice or more per day	pre dominantly non veg	non-science	GFGC
247	18	Govt	females	Non-science sstream	yes	yes	can't say	pre dinner	others	yes	more than one	yes			yes	weekly		17-19 years	non aerated	twice or more per day	pre dominantly non veg	non-science	GFGC
248	20	Govt	male	Non-science sstream	yes	yes	twice a day	tea time	while watching tv	no		no	yes	tastier	no	weekly	no	20-22 years	non aerated	twice or more per day	pre dominantly non veg	non-science	GFGC
249	18	Govt	male	Non-science sstream	yes	yes	twice a day	tea time	while watching tv	yes	breakfast	no	no		no	weekly	no	17-19 years	non aerated	twice or more per day	pre dominantly non veg	non-science	GFGC
250	18	Govt	male	Non-science sstream	yes	yes	thrice a day	tea time	while studying	yes	dinner	no	yes	tastier	no	daily	no	17-19 years	non aerated	twice or more per day	pre dominantly non veg	non-science	GFGC
251	19	Govt	male	Non-science sstream	yes	yes	once a day	tea time	others	yes	more than one	no	no		no	never	no	17-19 years	non aerated	once a day	predominantly veg	non-science	GFGC
252	20	Govt	male	Non-science sstream	yes	yes	can't say	tea time	others	yes	lunch	no	yes	tastier	yes	weekly	no	20-22 years	aerated	twice or more per day	pre dominantly non veg	non-science	GFGC
253	18	Govt	females	Non-science sstream	yes	yes	can't say	tea time	while studying	yes	breakfast	no	no		no	daily	yes	17-19 years	non aerated	twice or more per day	pre dominantly non veg	non-science	GFGC
254	17	Govt	females	Non-science sstream	yes	yes	once a day	tea time	while studying	yes	breakfast	yes	yes	tastier	yes	daily	yes	17-19 years	non aerated	once a day	pre dominantly non veg	non-science	GFGC
255	18	Govt	male	Non-science sstream	yes	yes	once a day	mid morning	while watching tv	yes	lunch	yes	yes	more convenient	yes		yes	17-19 years	non aerated	once a day	pre dominantly non veg	non-science	GFGC
256	18	Govt	females	Non-science sstream	yes	yes	once a day	tea time	while watching tv	yes	lunch	yes	no		yes	daily	no	17-19 years	non aerated	once a day	pre dominantly non veg	non-science	GFGC
257	18	Govt	females	Non-science sstream	yes	yes	once a day	tea time	while watching tv	yes	lunch	no	yes	to loose weight	yes	daily	no	17-19 years	non aerated	once a day	pre dominantly non veg	non-science	GFGC
258	18	Govt	females	Non-science sstream	yes	yes	twice a day	tea time	while watching tv	yes	breakfast	no	yes	to loose weight	yes	daily	no	17-19 years	non aerated	twice or more per day	predominantly veg	non-science	GFGC
259	20	Govt	male	Non-science sstream	yes	yes	once a day	pre dinner	while studying	yes	dinner	yes	yes	more convenient	no	daily	yes	20-22 years	non aerated	once a day	pre dominantly non veg	non-science	GFGC
260	18	Govt	male	Non-science sstream	yes	yes	once a day	mid morning	while watching tv	yes	lunch	yes	yes	more convenient	yes		yes	17-19 years	non aerated	once a day	predominantly veg	non-science	GFGC
261	18	Govt	male	Non-science sstream	yes	yes	once a day	mid morning	while watching tv	yes	lunch	yes	yes	more convenient	yes		yes	17-19 years	non aerated	once a day	predominantly veg	non-science	GFGC
262	20	Govt	male	Non-science sstream	yes	yes	can't say	mid morning	while studying	yes	breakfast	yes	no		yes	never		20-22 years	non aerated	twice or more per day	predominantly veg	non-science	GFGC
263	20	Govt	females	Non-science sstream	yes	yes	twice a day	tea time	while studying	no		no	yes	tastier	yes	weekly		20-22 years	aerated	twice or more per day	pre dominantly non veg	non-science	GFGC
264	20	Govt	females	Non-science sstream	yes	yes	twice a day	tea time	while studying	no		yes	yes	tastier	yes	weekly		20-22 years	non aerated	twice or more per day	pre dominantly non veg	non-science	GFGC
265	20	Govt	male	Non-science sstream	yes	yes	can't say	mid morning	while studying	yes	breakfast	yes	yes	more convenient	yes	never		20-22 years	non aerated	twice or more per day	predominantly veg	non-science	GFGC
266	20	Govt	females	Non-science sstream	yes	yes	can't say	mid morning	while watching tv	no		no	yes	tastier	yes	never		20-22 years	aerated	twice or more per day	predominantly veg	non-science	GFGC
267	21	Govt	male	Non-science sstream	yes	yes	once a day	tea time	while watching tv	yes	lunch	yes	no		yes	daily	no	20-22 years	non aerated	once a day	predominantly veg	non-science	GFGC
268	20	Govt	females	Non-science sstream	yes	yes	can't say	mid morning	while studying	yes	breakfast	yes	yes	more convenient	yes	never	yes	20-22 years	aerated	twice or more per day	predominantly veg	non-science	GFGC
269	19	Govt	females	Non-science sstream	yes	yes	twice a day	tea time	while watching tv	yes	lunch	no	yes	tastier	yes	weekly	yes	17-19 years	non aerated	twice or more per day	predominantly veg	non-science	GFGC
270	20	Govt	females	Non-science sstream	yes	yes	twice a day	tea time	others	yes	breakfast	no	no		yes	daily	yes	20-22 years	non aerated	twice or more per day	predominantly veg	non-science	GFGC
271	21	Govt	male	Non-science sstream	yes	yes	twice a day	tea time	others	yes	breakfast	no	yes	tastier	yes	weekly	yes	20-22 years	non aerated	twice or more per day	pre dominantly non veg	non-science	GFGC
272	21	Govt	male	Non-science sstream	yes	yes	can't say	tea time	others	yes	lunch	no	no		no	daily	no	20-22 years	non aerated	twice or more per day	predominantly veg	non-science	GFGC
273	20	Govt	male	Non-science sstream	yes	yes	once a day	tea time	others	no		no	yes	tastier	no	weekly	yes	20-22 years	non aerated	once a day	predominantly veg	non-science	GFGC
274	20	Govt	male	Non-science sstream	yes	yes	twice a day	tea time	while watching tv	yes	breakfast	yes	no		no	weekly		20-22 years	non aerated	twice or more per day	pre dominantly non veg	non-science	GFGC
275	21	Govt	male	Non-science sstream	yes	yes	once a day	tea time	while studying	yes	lunch	yes	yes	tastier	yes	weekly	no	20-22 years	non aerated	once a day	predominantly veg	non-science	GFGC
276	20	Govt	male	Non-science sstream	yes	yes	once a day	tea time	while watching tv	yes	lunch	no	no		yes	daily	yes	20-22 years	aerated	once a day	pre dominantly non veg	non-science	GFGC
277	22	Govt	male	Non-science sstream	yes	yes	twice a day	post dinner	while watching tv	yes	lunch	no	yes	tastier	no	weekly	no	20-22 years	non aerated	twice or more per day	predominantly veg	non-science	GFGC
278	21	Govt	male	Non-science sstream	yes	yes	once a day	tea time	while watching tv	yes	lunch	yes	yes	tastier	yes	weekly	yes	20-22 years	non aerated	once a day	predominantly veg	non-science	GFGC
279	20	Govt	male	Non-science sstream	yes	yes	once a day	tea time	while studying	yes	lunch	yes	yes	tastier	yes	weekly	yes	20-22 years	non aerated	once a day	predominantly veg	non-science	GFGC
280	20	Govt	male	Non-science sstream	yes	yes	thrice a day	pre dinner	while studying	yes	dinner	no	yes	more convenient	no	weekly	no	20-22 years	non aerated	twice or more per day	predominantly veg	non-science	GFGC
281	20	Govt	male	Non-science sstream	yes	yes	twice a day	mid morning	others	yes	lunch	yes	yes	more convenient	yes	daily	yes	20-22 years	non aerated	twice or more per day	predominantly veg	non-science	GFGC
282	22	Govt	male	Non-science sstream	yes	yes	twice a day	post dinner	while watching tv	yes	lunch	no	yes	tastier	no	daily	no	20-22 years	non aerated	twice or more per day	predominantly veg	non-science	GFGC
283	22	Govt	male	Non-science sstream	yes	yes	once a day	tea time	while studying	yes	dinner	yes	yes	tastier	yes	daily	no	20-22 years	non aerated	once a day	pre dominantly non veg	non-science	GFGC
284	22	Govt	male	Non-science sstream	yes	yes	once a day	tea time	while studying	yes	dinner	no	no		yes	weekly	yes	20-22 years	non aerated	once a day	pre dominantly non veg	non-science	GFGC
285	21	Govt	male	Non-science sstream	yes	yes	can't say	post dinner	while watching tv	yes	breakfast	yes	no	tastier	yes	daily	yes	20-22 years	non aerated	twice or more per day	predominantly veg	non-science	GFGC
286	20	Govt	male	Non-science sstream	yes	yes	can't say	tea time	while studying	yes	breakfast	yes	yes	more convenient	yes	daily	no	20-22 years	non aerated	twice or more per day	pre dominantly non veg	non-science	GFGC
287	20	Govt	male	Non-science sstream	yes	yes	once a day	tea time	others	yes	lunch	no	no		yes	daily	no	20-22 years	non aerated	once a day	pre dominantly non veg	non-science	GFGC
288	20	Govt	male	Non-science sstream	yes	yes	twice a day	tea time	while studying	yes	breakfast	yes	yes	tastier	yes	daily	no	20-22 years	non aerated	twice or more per day	pre dominantly non veg	non-science	GFGC
289	20	Govt	male	Non-science sstream	yes	yes	once a day	tea time	while studying	yes	breakfast	no	no		yes	daily	yes	20-22 years	non aerated	once a day	pre dominantly non veg	non-science	GFGC
290	21	Govt	male	Non-science sstream	yes	yes	twice a day	tea time	while studying	yes	lunch	yes	yes	tastier	yes	weekly	no	20-22 years	non aerated	twice or more per day	predominantly veg	non-science	GFGC
291	21	Govt	male	Non-science sstream	yes	yes	thrice a day	tea time	while watching tv	yes	dinner	no	yes	tastier	yes	never	no	20-22 years	non aerated	twice or more per day	pre dominantly non veg	non-science	GFGC
292	18	Govt	male	Non-science sstream	yes	yes	twice a day	tea time	while studying	yes	breakfast	no	no		no	never	no		non aerated	twice or more per day	predominantly veg	non-science	GFGC
293	22	Govt	male	Non-science sstream	yes	yes	once a day	tea time	while studying	yes	lunch	no	yes	tastier	yes	daily	yes	20-22 years	non aerated	once a day	pre dominantly non veg	non-science	GFGC
294	21	Govt	male	Non-science sstream	yes	yes	twice a day	tea time	while studying	yes	breakfast	no	yes	more convenient	yes	weekly	yes	20-22 years	non aerated	twice or more per day	pre dominantly non veg	non-science	GFGC
295	22	Govt	male	Non-science sstream	yes	yes	twice a day	tea time	others	yes	breakfast	no	no		no	weekly	yes	20-22 years	non aerated	twice or more per day	pre dominantly non veg	non-science	GFGC
296	19	Govt	male	Non-science sstream	yes	yes	twice a day	tea time	while watching tv	yes	breakfast	yes	yes	tastier	yes	daily	yes	17-19 years	non aerated	twice or more per day	pre dominantly non veg	non-science	GFGC
297	20	Govt	male	Non-science sstream	yes	yes	once a day	tea time	while studying	yes	breakfast	no	yes	to loose weight	no	daily	no	20-22 years	non aerated	once a day	predominantly veg	non-science	GFGC
298	20	Govt	females	Non-science sstream	yes	yes	twice a day	tea time	while studying	no		no	yes	tastier	yes	weekly	yes	20-22 years	non aerated	twice or more per day	pre dominantly non veg	non-science	GFGC
299	21	Govt	females	Non-science sstream	yes	yes	twice a day	tea time	hanging out with frds	yes	lunch	yes	yes	tastier		weekly	no	20-22 years	non aerated	twice or more per day	predominantly veg	non-science	GFGC
300	20	Govt	male	Non-science sstream	yes	yes	twice a day	tea time	while watching tv	yes	breakfast	yes	no		yes	daily	yes	20-22 years	non aerated	twice or more per day	pre dominantly non veg	non-science	GFGC
301	20	Govt	females	Non-science sstream	yes	yes	twice a day	tea time	while watching tv	yes	lunch	yes	yes	tastier	yes	weekly	no	20-22 years	non aerated	twice or more per day	predominantly veg	non-science	GFGC
302	20	Govt	females	Non-science sstream	yes	yes	twice a day	pre dinner	while watching tv	yes	lunch	yes	yes	more convenient	yes	weekly		20-22 years	non aerated	twice or more per day	predominantly veg	non-science	GFGC
303	20	Govt	male	Non-science sstream	yes	yes	once a day	pre dinner	hanging out with frds	yes	breakfast	yes	yes	tastier	yes	never	no	20-22 years	non aerated	once a day	pre dominantly non veg	non-science	GFGC
304	20	Govt	females	Non-science sstream	yes	yes	once a day	tea time	hanging out with frds	yes	breakfast	no	yes	tastier	yes	never	yes	20-22 years	non aerated	once a day	pre dominantly non veg	non-science	GFGC
305	20	Govt	females	Non-science sstream	yes	yes	twice a day	tea time	others	yes	lunch	yes	yes	tastier	yes	never	no	20-22 years	non aerated	twice or more per day	predominantly veg	non-science	GFGC
306	20	Govt	females	Non-science sstream	yes	yes	once a day	tea time	while watching tv	yes	breakfast	no	no		yes	weekly	yes	20-22 years	non aerated	once a day	predominantly veg	non-science	GFGC
307	21	Govt	females	Non-science sstream	yes	yes	twice a day	tea time	others	yes	breakfast	no	yes	tastier	yes	daily	no	20-22 years	non aerated	twice or more per day	pre dominantly non veg	non-science	GFGC
308	20	Govt	females	Non-science sstream	yes	yes	once a day	mid morning	while watching tv	yes	breakfast	no	yes	tastier	yes	never	no	20-22 years	non aerated	once a day	pre dominantly non veg	non-science	GFGC
309	20	Govt	females	Non-science sstream	yes	yes	once a day	pre dinner	while studying	no		no	yes	tastier	yes	weekly		20-22 years	non aerated	once a day	pre dominantly non veg	non-science	GFGC
310	20	Govt	females	Non-science sstream	yes	yes	twice a day	tea time	while studying	no		no	no		yes	weekly	no	20-22 years	non aerated	twice or more per day	pre dominantly non veg	non-science	GFGC
311	20	Govt	females	Non-science sstream	yes	yes	twice a day	tea time	while studying	no		no	yes	tastier	yes	weekly	no	20-22 years	non aerated	twice or more per day	pre dominantly non veg	non-science	GFGC
312	19	Govt	females	Non-science sstream	yes	yes	once a day	tea time	while studying	no		no	yes	tastier	yes	weekly	yes	17-19 years	non aerated	once a day	pre dominantly non veg	non-science	GFGC
313	18	Govt	females	Non-science sstream	yes	yes	once a day	tea time	others	yes	breakfast	no	yes	tastier	yes	never	yes	17-19 years	non aerated	once a day	pre dominantly non veg	non-science	GFGC
314	18	Govt	females	Non-science sstream	yes	yes	can't say	tea time	while studying	yes	breakfast	no	yes	tastier	yes	never	yes	17-19 years	aerated	twice or more per day	pre dominantly non veg	non-science	GFGC
315	18	Govt	females	Non-science sstream	yes	yes	can't say	tea time	while studying	yes	breakfast	no	yes	tastier	yes	never	yes	17-19 years	aerated	twice or more per day	pre dominantly non veg	non-science	GFGC
316	18	Govt	females	Non-science sstream	yes	yes	once a day	tea time	while watching tv	yes	breakfast	no	yes	tastier	yes	never	yes	17-19 years	non aerated	once a day	predominantly veg	non-science	GFGC
317	18	Govt	females	Non-science sstream	yes	yes	once a day	tea time	while watching tv	yes	dinner	yes	yes	tastier	yes	never	yes	17-19 years	non aerated	once a day	predominantly veg	non-science	GFGC
318	18	Govt	male	Non-science sstream	yes	yes	once a day	tea time	while watching tv	yes	lunch	no	yes	tastier	yes	never	no	17-19 years	non aerated	once a day	pre dominantly non veg	non-science	GFGC
319	18	Govt	male	Non-science sstream	yes	yes	twice a day	tea time	while watching tv	yes	lunch	no	yes	tastier	yes	never	no	17-19 years	non aerated	twice or more per day	pre dominantly non veg	non-science	GFGC
320	18	Govt	females	Non-science sstream	yes	yes	once a day	tea time	while watching tv	yes	breakfast	no	no		no	never	no	17-19 years	non aerated	once a day	predominantly veg	non-science	GFGC
321	18	Govt	females	Non-science sstream	yes	yes	once a day	tea time	while watching tv	yes	breakfast	no	no		no	never	no	17-19 years	non aerated	once a day	predominantly veg	non-science	GFGC
322	18	Govt	females	Non-science sstream	yes	yes	can't say	tea time	while watching tv	yes	breakfast	no	yes	tastier	yes	never	no	17-19 years	non aerated	twice or more per day	pre dominantly non veg	non-science	GFGC
323	18	Govt	females	Non-science sstream	yes	yes	can't say	tea time	while studying	yes	lunch	yes	yes	tastier	yes	never	no	17-19 years	non aerated	twice or more per day	predominantly veg	non-science	GFGC
324	18	Govt	females	Non-science sstream	yes	yes	can't say	pre dinner	while studying	yes	breakfast	no	yes	tastier	no	never	no	17-19 years	aerated	twice or more per day	predominantly veg	non-science	GFGC
325	18	Govt	male	Non-science sstream	yes	yes	twice a day	tea time	while studying	yes	dinner	yes	yes	tastier	yes	daily	no	17-19 years	non aerated	twice or more per day	pre dominantly non veg	non-science	GFGC
326	18	Govt	male	Non-science sstream	yes	yes	twice a day	tea time	while watching tv	yes	lunch	no	no		yes	daily	yes	17-19 years	aerated	twice or more per day	predominantly veg	non-science	GFGC
327	18	Govt	male	Non-science sstream	yes	yes	twice a day	tea time	while watching tv	yes	lunch	no	no		no	daily	no	17-19 years	aerated	twice or more per day	predominantly veg	non-science	GFGC
328	19	Govt	male	Non-science sstream	yes	yes	thrice a day	tea time	while studying	yes	breakfast	yes	yes	tastier	yes	weekly	yes	17-19 years	non aerated	twice or more per day	pre dominantly non veg	non-science	GFGC
329	18	Govt	females	Non-science sstream	yes	yes	can't say	tea time	while watching tv	yes	lunch	yes	yes	tastier	yes	never	no	17-19 years	non aerated	twice or more per day	pre dominantly non veg	non-science	GFGC
330	18	Govt	male	Non-science sstream	yes	yes	once a day	tea time	others	yes	breakfast	no	no		yes	daily	no	17-19 years	non aerated	once a day	predominantly veg	non-science	GFGC
331	18	Govt	male	Non-science sstream	yes	yes	once a day	tea time	while watching tv	yes	lunch	yes	yes	tastier	yes	weekly	yes	17-19 years	non aerated	once a day	predominantly veg	non-science	GFGC
332	18	Govt	male	Non-science sstream	yes	yes	once a day	tea time	others	yes	lunch	yes	yes	tastier	yes	weekly	yes	17-19 years	non aerated	once a day	predominantly veg	non-science	GFGC
333	18	Govt	male	Non-science sstream	yes	yes	twice a day	tea time	while watching tv	yes	lunch	no	yes	tastier	yes	weekly	yes	17-19 years	aerated	twice or more per day	predominantly veg	non-science	GFGC
334	18	Govt	male	Non-science sstream	yes	yes	twice a day	tea time	while studying	yes	lunch	no	no		no	daily	yes	17-19 years	aerated	twice or more per day	predominantly veg	non-science	GFGC
335	18	Govt	male	Non-science sstream	yes	yes	once a day	tea time	while watching tv	yes	dinner	yes	yes	more convenient	yes	weekly	no	17-19 years	non aerated	once a day	predominantly veg	non-science	GFGC
336	18	Govt	male	Non-science sstream	yes	yes	twice a day	tea time	while studying	yes	dinner	yes	yes	tastier	yes	daily	yes	17-19 years	aerated	twice or more per day	pre dominantly non veg	non-science	GFGC
337	19	Govt	male	Non-science sstream	yes	yes	once a day	tea time	while studying	yes	lunch	yes	yes	tastier	yes	daily	yes	17-19 years	non aerated	once a day	pre dominantly non veg	non-science	GFGC
338	18	Govt	male	Non-science sstream	yes	yes	thrice a day	tea time	while watching tv	yes	breakfast	no	yes	tastier	yes	weekly	yes	17-19 years	non aerated	twice or more per day	pre dominantly non veg	non-science	GFGC
339	19	Govt	male	Non-science sstream	yes	yes	twice a day	tea time	while watching tv	yes	breakfast	no	yes	tastier	yes	weekly	yes	17-19 years	non aerated	twice or more per day	predominantly veg	non-science	GFGC
340	17	Govt	females	Non-science sstream	yes	yes	once a day	tea time		no		yes	no		yes	daily	yes	17-19 years	aerated	once a day	predominantly veg	non-science	GFGC
341	17	Govt	females	Non-science sstream	yes	yes	can't say	tea time	while watching tv	yes	breakfast	yes	yes	to loose weight	yes	daily		17-19 years	non aerated	twice or more per day	pre dominantly non veg	non-science	GFGC
342	19	Govt	male	Non-science sstream	yes	yes	can't say	tea time	others	yes	breakfast	no	no		yes	daily	no	17-19 years	non aerated	twice or more per day	pre dominantly non veg	non-science	GFGC
343	18	Govt	male	Non-science sstream	yes	yes	twice a day	tea time	while watching tv	yes	more than one	no	no		yes	daily	yes	17-19 years	non aerated	twice or more per day	pre dominantly non veg	non-science	GFGC
344	18	Govt	male	Non-science sstream	yes	yes	twice a day	post dinner	while studying	yes	dinner	yes	yes	tastier	yes	weekly	no	17-19 years	non aerated	twice or more per day	pre dominantly non veg	non-science	GFGC
345	17	Govt	male	Non-science sstream	yes	yes	twice a day	tea time	while watching tv	yes	dinner	yes	no		yes	daily	no	17-19 years	non aerated	twice or more per day	predominantly veg	non-science	GFGC
346	18	Govt	male	Non-science sstream	yes	yes	once a day	tea time	while studying	yes	breakfast	no	yes	tastier	yes	daily	yes	17-19 years	non aerated	once a day	predominantly veg	non-science	GFGC
347	18	Govt	male	Non-science sstream	yes	yes	twice a day	pre dinner	while watching tv	yes	dinner	yes	yes	more convenient	yes	daily	yes		non aerated	twice or more per day	pre dominantly non veg	non-science	GFGC
348	18	Govt	male	Non-science sstream	yes	yes	twice a day	pre dinner	while watching tv	yes	dinner	no	yes	more convenient	no	daily	yes	17-19 years	non aerated	twice or more per day	predominantly veg	non-science	GFGC
349	19	Govt	male	Non-science sstream	yes	yes	can't say	post dinner	while studying	yes	lunch	no	no		no	daily	yes	17-19 years	non aerated	twice or more per day	pre dominantly non veg	non-science	GFGC
350	19	Govt	male	Non-science sstream	yes	yes	can't say	post dinner	while studying	yes	lunch	no	no		no	daily	yes	17-19 years	non aerated	twice or more per day	pre dominantly non veg	non-science	GFGC
351	18	Govt	male	Non-science sstream	no	no				no		no	no		yes	daily	yes	17-19 years	non aerated	twice or more per day	pre dominantly non veg	non-science	GFGC
352	17	Govt	male	Non-science sstream	no	no				no		no	yes	tastier	yes	never	yes	17-19 years	aerated	once a day	pre dominantly non veg	non-science	GFGC
353	17	Govt	females	Non-science sstream	no	no				no		no	yes	tastier	yes	never	no	17-19 years	non aerated	twice or more per day	predominantly veg	non-science	GFGC
354	18	Govt	females	Non-science sstream	yes	yes	can't say	pre dinner	while watching tv	no		no	yes	tastier	no	never	yes	17-19 years	aerated	twice or more per day	pre dominantly non veg	non-science	GFGC
355	17	Govt	male	Non-science sstream	no	no				yes	dinner	yes	yes	to loose weight	no	daily	yes	17-19 years	non aerated	once a day	predominantly veg	non-science	GFGC
356	18	Govt	male	Non-science sstream	no	no				no		no	no		yes	daily	no	17-19 years	non aerated	once a day	pre dominantly non veg	non-science	GFGC
357	18	Govt	females	Non-science sstream	no	no				no		yes	yes	to loose weight	yes	weekly	no	17-19 years	non aerated	twice or more per day	predominantly veg	non-science	GFGC
358	17	Govt	male	Non-science sstream	yes	yes	twice a day	tea time	while watching tv	no		no	yes	more convenient	yes	daily	no	17-19 years	non aerated	twice or more per day	predominantly veg	non-science	GFGC
359	18	Govt	females	Non-science sstream	no	no				no		yes	yes	to loose weight	yes	weekly	no	17-19 years	non aerated	twice or more per day	predominantly veg	non-science	GFGC
360	17	Govt	females	Non-science sstream	no	no				no		no	no		no	weekly	no	17-19 years	non aerated	once a day	predominantly veg	non-science	GFGC
361	17	Govt	females	Non-science sstream	no	no				yes	breakfast	no	yes	tastier	yes	weekly	no	17-19 years	non aerated	once a day	predominantly veg	non-science	GFGC
362	18	Govt	females	Non-science sstream	no	no				yes	dinner	no	yes	tastier	yes	weekly	no	17-19 years	non aerated	once a day	pre dominantly non veg	non-science	GFGC
363	18	Govt	females	Non-science sstream	yes	yes	once a day	tea time	while studying	yes	more than one	no	yes	to loose weight	yes	daily	yes	17-19 years	aerated	once a day	pre dominantly non veg	non-science	GFGC
364	19	Govt	females	Non-science sstream	no	no				yes	dinner	yes	yes	more convenient	yes	daily	no	17-19 years	non aerated	once a day	predominantly veg	non-science	GFGC
365	18	Govt	male	Non-science sstream	no	no				no		no	no		yes	daily	yes	17-19 years	non aerated	once a day	pre dominantly non veg	non-science	GFGC
366	18	Govt	male	Non-science sstream	no	no				no		no	no		yes	weekly	no	17-19 years	non aerated	once a day	predominantly veg	non-science	GFGC
367	18	Govt	male	Non-science sstream	no	no				yes	dinner	no	yes	to loose weight	no	daily	no	17-19 years	non aerated	once a day	pre dominantly non veg	non-science	GFGC
368	18	Govt	male	Non-science sstream	no	no				no		no	yes	tastier	no	daily	no	17-19 years	non aerated	twice or more per day	pre dominantly non veg	non-science	GFGC
369	18	Govt	male	Non-science sstream	no	no				yes	dinner	no	yes	more convenient	no	never	yes	17-19 years	non aerated	twice or more per day	predominantly veg	non-science	GFGC
370	17	Govt	male	Non-science sstream	no	no				no		no	no				no	17-19 years	aerated	once a day	pre dominantly non veg	non-science	GFGC
371	17	Govt	male	Non-science sstream	no	no				no		no	yes	tastier	no	daily	no	17-19 years	non aerated	once a day	predominantly veg	non-science	GFGC
372	19	Govt	male	Non-science sstream	no	no				no		no	yes	to loose weight	yes	daily	no	17-19 years	non aerated	once a day	pre dominantly non veg	non-science	GFGC
373	18	Govt	male	Non-science sstream	no	no				yes	dinner	yes	yes	tastier	yes	weekly	no	17-19 years	non aerated	once a day	pre dominantly non veg	non-science	GFGC
374	18	Govt	females	Non-science sstream	no	no				no		yes	yes	more convenient	yes	daily	no	17-19 years	aerated	twice or more per day	predominantly veg	non-science	GFGC
375	18	Govt	females	Non-science sstream	no	no				no		yes	yes	tastier	no	daily	no	17-19 years	non aerated	once a day	predominantly veg	non-science	GFGC
376	18	Govt	females	Non-science sstream	no	no				no		no	no		no	daily	no	17-19 years	non aerated	once a day	predominantly veg	non-science	GFGC
377	19	Govt	females	Non-science sstream	no	no				no		yes	yes	tastier	no	daily	no	17-19 years	non aerated	once a day	predominantly veg	non-science	GFGC
378	18	Govt	females	Non-science sstream	no	no				no		no	no		no	never	no	17-19 years	non aerated	once a day	predominantly veg	non-science	GFGC
379	18	Govt	females	Non-science sstream	yes	yes	twice a day	tea time	while watching tv	yes	breakfast	no	no		yes	weekly	yes	17-19 years	non aerated	twice or more per day	predominantly veg	non-science	GFGC
380	18	Govt	females	Non-science sstream	no	no				yes	dinner	yes	yes	tastier	yes	weekly	yes	17-19 years	non aerated	once a day	pre dominantly non veg	non-science	GFGC
381	17	Govt	male	Non-science sstream	no	no				no		yes	yes	tastier	yes	weekly	yes	17-19 years	non aerated	once a day	predominantly veg	non-science	GFGC
382	18	Govt	females	Non-science sstream	no	no				yes	lunch	no	yes	tastier	yes	never	yes	17-19 years	aerated	once a day	pre dominantly non veg	non-science	GFGC
383	18	Govt	male	Non-science sstream	yes	yes	once a day	tea time	while studying	no		yes	yes	tastier	yes	daily	no	17-19 years	aerated	once a day	pre dominantly non veg	non-science	GFGC
384	17	Govt	females	Non-science sstream	yes	yes	once a day	tea time	while watching tv	yes	dinner	no	no		yes	daily	yes	17-19 years	non aerated	once a day	pre dominantly non veg	non-science	GFGC
385	18	Govt	females	Non-science sstream	yes	yes	can't say	tea time	while watching tv	no		no	no		yes	daily	yes	17-19 years	non aerated	twice or more per day	pre dominantly non veg	non-science	GFGC
386	18	Govt	females	Non-science sstream	no	no				no		yes	yes	tastier	yes	daily	yes	17-19 years	non aerated	twice or more per day	pre dominantly non veg	non-science	GFGC
387	18	Govt	females	Non-science sstream	no	no				no		yes	yes	tastier	yes	daily	yes	17-19 years	non aerated	twice or more per day	pre dominantly non veg	non-science	GFGC
388	18	Govt	females	Non-science sstream	no	no				yes	dinner	yes	yes	more convenient	yes	never	no	17-19 years	non aerated	twice or more per day	pre dominantly non veg	non-science	GFGC
389	19	Govt	females	Non-science sstream	no	no				yes	lunch	no	yes	to loose weight	yes	never	no	17-19 years	non aerated	once a day	pre dominantly non veg	non-science	GFGC
390	17	Govt	females	Non-science sstream	no	no				no		yes	yes	tastier	yes	weekly	no	17-19 years	non aerated	once a day	predominantly veg	non-science	GFGC
391	19	Govt	females	Non-science sstream	no	no				yes	dinner	yes	yes	more convenient	yes	daily	yes	17-19 years	non aerated	once a day	pre dominantly non veg	non-science	GFGC
392	18	Govt	male	Non-science sstream	no	no				no		yes	yes	more convenient	yes	never	yes	17-19 years	non aerated	once a day	predominantly veg	non-science	GFGC
393	17	Govt	male	Non-science sstream	no	no				yes	more than one	no	no		yes	daily	no	17-19 years	non aerated	twice or more per day	pre dominantly non veg	non-science	GFGC
394	18	Govt	male	Non-science sstream	no	no				no		yes	yes	more convenient	yes	weekly	no	17-19 years	non aerated	twice or more per day	pre dominantly non veg	non-science	GFGC
395	18	Govt	females	Non-science sstream	no	no				no		yes	yes	tastier	yes	daily	yes	17-19 years	non aerated	once a day	pre dominantly non veg	non-science	GFGC
396	18	Govt	females	Non-science sstream	no	no				no		no	no		yes	never	yes	17-19 years	non aerated	once a day	pre dominantly non veg	non-science	GFGC
397	18	Govt	females	Non-science sstream	no	no				no		no	no		yes	never	yes	17-19 years	non aerated	once a day	predominantly veg	non-science	GFGC
398	18	Govt	females	Non-science sstream	yes	yes	once a day	tea time	while watching tv	no		yes	yes	to loose weight	yes	never	yes	17-19 years	non aerated	once a day	pre dominantly non veg	non-science	GFGC
399	18	Govt	females	Non-science sstream	yes	yes	can't say	tea time	while studying	yes	more than one	yes	yes	tastier	no	never	yes	17-19 years	non aerated	twice or more per day	predominantly veg	non-science	GFGC
400	18	Govt	females	Non-science sstream	yes	yes	can't say	tea time	while studying	yes	lunch	yes	yes	tastier	no	weekly	yes	17-19 years	aerated	twice or more per day	predominantly veg	non-science	GFGC
401	18	Govt	females	Non-science sstream	yes	yes	once a day	post dinner	while studying	yes	breakfast	no	yes	tastier	yes	never	yes	17-19 years	aerated	once a day	pre dominantly non veg	non-science	GFGC
402	18	Govt	females	Non-science sstream	no	no				yes	dinner	no	yes	tastier	yes	daily	yes	17-19 years	aerated	once a day	pre dominantly non veg	non-science	GFGC
403	18	Govt	females	Non-science sstream	yes	yes	once a day	post dinner	others	yes	lunch	no	yes	tastier	yes	never	yes	17-19 years	aerated	once a day	pre dominantly non veg	non-science	GFGC
404	18	Govt	females	Non-science sstream	yes	yes	once a day	tea time	while watching tv	yes	dinner	no	yes	tastier	yes	weekly	yes	17-19 years	non aerated	once a day	predominantly veg	non-science	GFGC
405	18	Govt	male	Non-science sstream	yes	yes	twice a day	tea time	while watching tv	yes	dinner	yes	yes	more convenient	yes	weekly	no	17-19 years	non aerated	twice or more per day	pre dominantly non veg	non-science	GFGC
406	18	Govt	females	Non-science sstream	no	no				yes	dinner	no	yes	tastier	yes	weekly	yes	17-19 years	aerated	once a day	predominantly veg	non-science	GFGC
407	18	Govt	females	Non-science sstream	no	no				yes	dinner	no	yes	tastier	yes	weekly	yes	17-19 years	non aerated	once a day	predominantly veg	non-science	GFGC
408	18	Govt	females	Non-science sstream	no	no				no		no	yes	tastier	yes	weekly	yes	17-19 years	non aerated	twice or more per day	predominantly veg	non-science	GFGC
409	19	Govt	females	Non-science sstream	yes	yes	twice a day	tea time	while watching tv	yes	dinner	yes	no		yes	weekly	yes	17-19 years	non aerated	twice or more per day	pre dominantly non veg	non-science	GFGC
410	18	Govt	females	Non-science sstream	no	no				yes	more than one	no	yes	tastier	no	never	yes	17-19 years	non aerated	twice or more per day	pre dominantly non veg	non-science	GFGC
411	18	Govt	females	Non-science sstream	yes	yes	can't say	tea time	while watching tv	yes	dinner	no	yes	to loose weight	yes	daily	no	17-19 years	non aerated	twice or more per day	predominantly veg	non-science	GFGC
412	18	Govt	females	Non-science sstream	no	no				yes	breakfast	no	yes	to loose weight	yes	daily	yes	17-19 years	non aerated	twice or more per day	predominantly veg	non-science	GFGC
413	17	Govt	females	Non-science sstream	yes	yes	once a day	tea time	while studying	yes	dinner	yes	yes	tastier	yes	weekly	yes	17-19 years	non aerated	once a day	predominantly veg	non-science	GFGC
414	17	Govt	females	Non-science sstream	no	no				no		yes	yes	tastier	yes	daily	no	17-19 years	non aerated	once a day	predominantly veg	non-science	GFGC
415	18	Govt	females	Non-science sstream	no	no				no		no	yes	tastier	yes	weekly	no	17-19 years	non aerated	once a day	predominantly veg	non-science	GFGC
416	18	Govt	male	Non-science sstream	no	no				yes	dinner	no	yes	tastier	yes	daily	yes	17-19 years	non aerated	twice or more per day	pre dominantly non veg	non-science	GFGC
417	20	Govt	male	Non-science sstream	yes	yes	can't say	tea time	while studying	no		no	no		no	weekly	yes	20-22 years	non aerated	twice or more per day	pre dominantly non veg	non-science	GFGC
418	18	Govt	male	Non-science sstream	no	no				no		no	yes	tastier	yes	daily	yes	17-19 years	non aerated	twice or more per day	pre dominantly non veg	non-science	GFGC
419	18	Govt	male	Non-science sstream	no	no				no		no	yes	tastier	yes	daily	yes	17-19 years	non aerated	twice or more per day	pre dominantly non veg	non-science	GFGC
420	17	Govt	females	Non-science sstream	no	no				no		no	no		yes	daily	no	17-19 years	non aerated	twice or more per day	predominantly veg	non-science	GFGC
421	17	Govt	females	Non-science sstream	yes	yes	can't say	tea time	while watching tv	no		no	yes	tastier	no	never	yes	17-19 years	non aerated	twice or more per day	pre dominantly non veg	non-science	GFGC
422	18	Govt	male	Non-science sstream	no	no				yes	breakfast	yes	yes	tastier	no	daily	yes	17-19 years	non aerated	once a day	predominantly veg	non-science	GFGC
423	19	Govt	male	Non-science sstream	no	no				yes	dinner	no	no		no	never	yes	17-19 years	aerated	twice or more per day	pre dominantly non veg	non-science	GFGC
424	19	Govt	male	Non-science sstream	no	no				yes	dinner	no	no		yes	daily	yes	17-19 years	non aerated	twice or more per day	predominantly veg	non-science	GFGC
425	18	Govt	male	Non-science sstream	no	no				no		yes	yes	to loose weight	yes	weekly	yes	17-19 years	non aerated	twice or more per day	predominantly veg	non-science	GFGC
426	17	Govt	male	Non-science sstream	yes	yes	thrice a day	mid morning	while studying	yes	breakfast	yes	yes	to loose weight	yes	never	yes	17-19 years	non aerated	twice or more per day	predominantly veg	non-science	GFGC
427	17	Govt	females	Non-science sstream	no	no				no		no	no		yes	daily	no	17-19 years	non aerated	once a day	pre dominantly non veg	non-science	GFGC
428	18	Govt	male	Non-science sstream	no	no				yes	dinner	yes	yes	tastier	no	never	yes	17-19 years	aerated	twice or more per day	pre dominantly non veg	non-science	GFGC
429	18	Govt	females	Non-science sstream	yes	yes	can't say	tea time	while watching tv	yes	breakfast	yes	yes	tastier	yes	weekly	yes	17-19 years	aerated	twice or more per day	pre dominantly non veg	non-science	GFGC
430	18	Govt	females	Non-science sstream	no	no				yes	lunch	no	yes	tastier	no	daily	yes	17-19 years	non aerated	twice or more per day	predominantly veg	non-science	GFGC
431	19	Govt	females	Non-science sstream	yes	yes	twice a day	tea time	while studying	no		no	yes	to loose weight	yes	daily	yes	17-19 years	non aerated	twice or more per day	pre dominantly non veg	non-science	GFGC
432	19	Govt	females	Non-science sstream	yes	yes	twice a day	tea time	while studying	no		no	yes	tastier	yes	daily	yes	17-19 years	non aerated	twice or more per day	pre dominantly non veg	non-science	GFGC
433	17	Govt	females	Non-science sstream	yes	yes	thrice a day	tea time	while studying	yes	breakfast	no	yes	to loose weight	yes	never	no	17-19 years	non aerated	twice or more per day	pre dominantly non veg	non-science	GFGC
434	18	Govt	females	Non-science sstream	yes	yes	thrice a day	tea time	while watching tv	yes	breakfast	no	yes	to loose weight	yes	daily	no	17-19 years	non aerated	twice or more per day	pre dominantly non veg	non-science	GFGC
435	18	Govt	females	Non-science sstream	yes	yes	twice a day	tea time	while watching tv	yes	breakfast	no	yes	to loose weight	yes	daily	no	17-19 years	non aerated	twice or more per day	pre dominantly non veg	non-science	GFGC
436	18	Govt	females	Non-science sstream	yes	yes	twice a day	tea time	while studying	yes	breakfast	yes	yes	tastier	yes	daily	no	17-19 years	non aerated	twice or more per day	pre dominantly non veg	non-science	GFGC
437	18	Govt	females	Non-science sstream	yes	yes	twice a day	tea time	while studying	yes	breakfast	yes	yes	tastier	yes	daily	yes	17-19 years	non aerated	twice or more per day	predominantly veg	non-science	GFGC
438	20	Govt	male	Non-science sstream	no	no				yes	breakfast	no	no		no	daily	yes	20-22 years	non aerated	twice or more per day	pre dominantly non veg	non-science	GFGC
439	20	Govt	females	Non-science sstream	yes	yes	once a day	tea time	while watching tv	yes	breakfast	no	yes	tastier	no	never	no	20-22 years	non aerated	once a day	pre dominantly non veg	non-science	GFGC
440	20	Govt	females	Non-science sstream	yes	yes	once a day	tea time	while watching tv	no		no	yes	tastier	no	weekly	yes	20-22 years	non aerated	once a day	pre dominantly non veg	non-science	GFGC
441	21	Govt	females	Non-science sstream	no	no				no		no	yes	tastier	yes	daily	no	20-22 years	non aerated	twice or more per day	predominantly veg	non-science	GFGC
442	21	Govt	females	Non-science sstream	no	no				no		no	yes	to loose weight	yes	daily	no	20-22 years	non aerated	twice or more per day	predominantly veg	non-science	GFGC
443	20	Govt	females	Non-science sstream	no	no				no		no	yes	to loose weight	yes	daily	no	20-22 years	non aerated	twice or more per day	predominantly veg	non-science	GFGC
444	20	Govt	females	Non-science sstream	no	no				no		no	yes	tastier	yes	daily	no	20-22 years	non aerated	once a day	predominantly veg	non-science	GFGC
445	20	Govt	females	Non-science sstream	yes	yes	once a day	tea time	while watching tv	yes	breakfast	no	yes	tastier	yes	never	yes	20-22 years	non aerated	once a day	pre dominantly non veg	non-science	GFGC
446	22	Govt	females	Non-science sstream	yes	yes	once a day	tea time	while watching tv	yes	breakfast	no	yes	tastier	yes	never	yes	20-22 years	non aerated	once a day	predominantly veg	non-science	GFGC
447	20	Govt	females	Non-science sstream	yes	yes	once a day	post dinner	while studying	no		no	yes	to loose weight	yes	daily	yes	20-22 years	non aerated	once a day	predominantly veg	non-science	GFGC
448	19	Govt	females	Non-science sstream	yes	yes	once a day	tea time	while watching tv	no		no	yes	to loose weight	yes	daily	yes	17-19 years	non aerated	once a day	predominantly veg	non-science	GFGC
449	20	Govt	females	Non-science sstream	no	no				no		no	no		yes	never	no	20-22 years	non aerated	once a day	predominantly veg	non-science	GFGC
450	19	Govt	females	Non-science sstream	no	no				no		no	no		yes	never	yes	17-19 years	non aerated	once a day	predominantly veg	non-science	GFGC
451	20	Govt	females	Non-science sstream	no	no				yes	breakfast	no	yes	tastier	yes	never	yes	20-22 years	non aerated	once a day	pre dominantly non veg	non-science	GFGC
452	20	Govt	females	Non-science sstream	no	no				yes	breakfast	no	yes	tastier	yes	never	yes	20-22 years	non aerated	once a day	pre dominantly non veg	non-science	GFGC
453	23	Govt	females	Non-science sstream	no	no				yes	breakfast	yes	yes	tastier	yes	daily	no	23-25 years	non aerated	once a day	predominantly veg	non-science	GFGC
454	19	Govt	females	Non-science sstream	no	no				no		no	yes	to loose weight	yes	weekly	no	17-19 years	non aerated	twice or more per day	predominantly veg	non-science	GFGC
455	20	Govt	females	Non-science sstream	no	no				no		no	no		no	daily	yes	20-22 years	non aerated	once a day	predominantly veg	non-science	GFGC
456	19	Govt	females	Non-science sstream	yes	yes	once a day	tea time	while watching tv	yes	breakfast	yes	yes	tastier	yes	never	yes	17-19 years	non aerated	once a day	predominantly veg	non-science	GFGC
457	19	Govt	females	Non-science sstream	yes	yes	once a day	tea time	while watching tv	yes	breakfast	yes	yes	tastier	yes	never	yes	17-19 years	non aerated	once a day	predominantly veg	non-science	GFGC
458	20	Govt	females	Non-science sstream	yes	yes	once a day	tea time	while watching tv	no		no	yes	to loose weight	yes	never	yes	20-22 years	non aerated	once a day	predominantly veg	non-science	GFGC
459	20	Govt	females	Non-science sstream	yes	yes	once a day	tea time	while watching tv	yes	breakfast	yes	yes	tastier	yes	never	yes	20-22 years	non aerated	once a day	predominantly veg	non-science	GFGC
460	19	Govt	females	Non-science sstream	no	no				no		no	yes	tastier	no	weekly	no	17-19 years	non aerated	twice or more per day	predominantly veg	non-science	GFGC
461	23	Govt	male	Non-science sstream	no	no				no		yes	yes	to loose weight	yes	daily	no	23-25 years	non aerated	once a day	predominantly veg	non-science	GFGC
462	21	Govt	male	Non-science sstream	yes	yes	can't say	post dinner	while studying	yes	dinner	yes	yes	to loose weight	yes	daily	no	20-22 years	non aerated	twice or more per day	predominantly veg	non-science	GFGC
463	22	Govt	male	Non-science sstream	yes	yes	can't say	pre dinner	while studying	yes	more than one	yes	yes	to loose weight	yes	daily	yes	20-22 years	non aerated	twice or more per day	predominantly veg	non-science	GFGC
464	20	Govt	females	Non-science sstream	no	no				no		yes	yes	tastier	no	weekly	no	20-22 years	non aerated	once a day	predominantly veg	non-science	GFGC
465	19	Govt	females	Non-science sstream	yes	yes	once a day	tea time	while watching tv	no		no	yes	tastier	yes	never	no	17-19 years	aerated	once a day	predominantly veg	non-science	GFGC
466	20	Govt	females	Non-science sstream	no	no				no		yes	yes	tastier	yes	never	yes	20-22 years	non aerated	once a day	predominantly veg	non-science	GFGC
467	19	Govt	females	Science stream	no	no				no		yes	yes	to loose weight	yes	never	yes	17-19 years	non aerated	once a day	pre dominantly non veg	science	GFGC
468	19	Govt	male	Science stream	no	no				no		yes	yes	to loose weight	yes	never	yes	17-19 years	non aerated	twice or more per day	predominantly veg	science	GFGC
469	18	Govt	females	Science stream	no	no				yes	lunch	no	no		yes	weekly	yes	17-19 years	aerated	once a day	predominantly veg	science	GFGC
470	19	Govt	male	Science stream	no	no				yes	breakfast	yes	yes		yes	never	no	17-19 years	non aerated	twice or more per day	predominantly veg	science	GFGC
471	18	Govt	females	Science stream	yes	yes	twice a day	tea time	while watching tv	yes	breakfast	no	no	more convenient	yes	daily	yes	17-19 years	non aerated	twice or more per day	pre dominantly non veg	science	GFGC
472	19	Govt	male	Science stream	no	no				no		no	yes	tastier	no	daily	no	17-19 years	non aerated	twice or more per day	pre dominantly non veg	science	GFGC
473	20	Govt	male	Science stream	yes	yes	thrice a day	tea time	while studying	no		yes	yes	to loose weight	yes	daily	yes	20-22 years	non aerated	twice or more per day	pre dominantly non veg	science	GFGC
474	18	Govt	male	Science stream	no	no				no		no	yes	tastier	no	weekly	yes	17-19 years	non aerated	twice or more per day	pre dominantly non veg	science	GFGC
475	19	Govt	male	Science stream	yes	yes	once a day	tea time	while studying	yes	more than one	yes	yes	to loose weight	yes	weekly	yes	17-19 years	non aerated	once a day	predominantly veg	science	GFGC
476	19	Govt	females	Science stream	yes	yes	twice a day	tea time	while watching tv	no		no	yes	tastier	yes	weekly	yes	17-19 years	non aerated	twice or more per day	predominantly veg	science	GFGC
477	25	Govt	male	Science stream	no	no				no		no	no		yes	daily	yes	23-25 years	non aerated	twice or more per day	predominantly veg	science	GFGC
478	20	Govt	male	Science stream	no	no				no		yes	yes	tastier	yes	daily	yes	20-22 years	non aerated	twice or more per day	predominantly veg	science	GFGC
479	19	Govt	females	Science stream	no	no				no		no	yes	tastier	no	weekly	yes	17-19 years	non aerated	once a day	predominantly veg	science	GFGC
480	19	Govt	male	Science stream	no	no				yes	dinner	yes	yes	tastier	no	weekly	yes	17-19 years	non aerated	twice or more per day	pre dominantly non veg	science	GFGC
481	21	Govt	male	Science stream	yes	yes	twice a day	post dinner	while watching tv	yes	dinner	no	yes	tastier	yes	daily	yes	20-22 years	non aerated	twice or more per day	pre dominantly non veg	science	GFGC
482	18	Govt	females	Science stream	yes	yes	twice a day	tea time	while watching tv	no		no	yes	tastier	no	daily	yes	17-19 years	non aerated	twice or more per day	predominantly veg	science	GFGC
483	19	Govt	male	Science stream	yes	yes	can't say	tea time	while studying	yes	dinner	no	yes	tastier	yes	daily	yes	17-19 years	non aerated	twice or more per day	predominantly veg	science	GFGC
484	17	Govt	females	Science stream	no	no				yes	breakfast	no	no		yes	weekly	no	17-19 years	non aerated	once a day	predominantly veg	science	GFGC
485	17	Govt	females	Non-science sstream	no	no				yes	lunch	no	yes	tastier	yes	never	yes	17-19 years	non aerated	twice or more per day	predominantly veg	non-science	GFGC
486	18	Govt	females	Non-science sstream	no	no				no		no	yes	to loose weight	yes	never	no	17-19 years	non aerated	twice or more per day	predominantly veg	non-science	GFGC
487	18	Govt	females	Non-science sstream	no	no				no		no	yes	to loose weight	yes	never	yes	17-19 years	non aerated	once a day	pre dominantly non veg	non-science	GFGC
488	17	Govt	females	Non-science sstream	yes	yes	once a day	tea time	while studying	yes	dinner	no	no		yes	never	no	17-19 years	non aerated	once a day	pre dominantly non veg	non-science	GFGC
489	18	Govt	females	Non-science sstream	no	no				yes	lunch	no	no		yes	daily	yes	17-19 years	non aerated	once a day	predominantly veg	non-science	GFGC
490	18	Govt	females	Non-science sstream	yes	yes	once a day	pre dinner	while watching tv	yes	dinner	yes	yes	tastier	yes	never	no	17-19 years	aerated	once a day	pre dominantly non veg	non-science	GFGC
491	18	2	male	Non-science sstream	yes	yes	twice a day	tea time	while studying	no		no	yes	tastier	no	never	no	17-19 years	aerated	twice or more per day	pre dominantly non veg	non-science	SDM
492	17	2	male	Non-science sstream	yes	yes	once a day	tea time	while watching tv	yes	dinner	no	no		yes	daily	no	17-19 years	non aerated	once a day	predominantly veg	non-science	SDM
493	18	2	male	Non-science sstream	no	no				no		no	yes	tastier	yes	weekly	yes	17-19 years	aerated	twice or more per day	pre dominantly non veg	non-science	SDM
494	19	2	male	Non-science sstream	yes	yes	can't say	tea time	while studying	no		no	no		yes	never	no	17-19 years	non aerated	twice or more per day	pre dominantly non veg	non-science	SDM
495	19	2	male	Non-science sstream	no	no				yes	breakfast	no	no		no	weekly	yes	17-19 years	non aerated	twice or more per day	pre dominantly non veg	non-science	SDM
496	19	2	male	Non-science sstream	yes	yes	can't say	tea time	while watching tv	no		no	yes	tastier	yes	daily	no	17-19 years	non aerated	twice or more per day	pre dominantly non veg	non-science	SDM
497	19	2	male	Non-science sstream	no	no				yes	dinner	yes	no		no	daily	no	17-19 years	aerated	once a day	predominantly veg	non-science	SDM
498	18	2	male	Non-science sstream	no	no				yes	dinner	yes	yes	tastier	yes	never	yes	17-19 years	non aerated	once a day	pre dominantly non veg	non-science	SDM
499	18	2	male	Non-science sstream	yes	yes	twice a day	tea time	while watching tv	yes	breakfast	yes	no		yes	weekly	yes	17-19 years	non aerated	twice or more per day	pre dominantly non veg	non-science	SDM
500	18	2	male	Non-science sstream	no	no				no		no	no		yes	never	yes	17-19 years	non aerated	twice or more per day	predominantly veg	non-science	SDM
501	18	2	male	Non-science sstream	yes	yes	twice a day	tea time	while studying	yes	lunch	no	no		yes	weekly	yes	17-19 years	non aerated	twice or more per day	pre dominantly non veg	non-science	SDM
502	18	2	male	Non-science sstream	yes	yes	twice a day	tea time	while studying	no		no	yes	tastier	yes	daily	no	17-19 years	aerated	twice or more per day	pre dominantly non veg	non-science	SDM
503	18	2	females	Non-science sstream	no	no				no		no	no		yes	weekly	yes	17-19 years	non aerated	twice or more per day	predominantly veg	non-science	SDM
504	18	2	females	Non-science sstream	yes	yes	can't say	post dinner	while watching tv	yes	breakfast	no	yes	tastier	no	never	no	17-19 years	non aerated	twice or more per day	pre dominantly non veg	non-science	SDM
505	18	2	females	Non-science sstream	yes	yes	can't say	pre dinner	while studying	yes	breakfast	no	yes	tastier	no	never	yes	17-19 years	non aerated	twice or more per day	pre dominantly non veg	non-science	SDM
506	18	2	females	Non-science sstream	yes	yes	can't say	post dinner	while watching tv	yes	breakfast	no	yes	tastier	no	never	no	17-19 years	non aerated	twice or more per day	pre dominantly non veg	non-science	SDM
507	18	2	females	Non-science sstream	yes	yes	twice a day	tea time	while watching tv	no		no	no		yes	never	yes	17-19 years	non aerated	twice or more per day	pre dominantly non veg	non-science	SDM
508	18	2	females	Non-science sstream	no	no				no		no	no		yes	daily	yes	17-19 years	non aerated	twice or more per day	predominantly veg	non-science	SDM
509	19	2	females	Non-science sstream	no	no				no		no	no		yes	daily	yes	17-19 years	non aerated	twice or more per day	predominantly veg	non-science	SDM
510	19	2	females	Non-science sstream	no	no				yes	breakfast	no	no		yes	daily	yes	17-19 years	non aerated	twice or more per day	predominantly veg	non-science	SDM
511	18	2	male	Non-science sstream	yes	yes	twice a day	tea time	while studying	no		no	yes	tastier	yes	daily	yes	17-19 years	aerated	twice or more per day	pre dominantly non veg	non-science	SDM
512	17	2	male	Non-science sstream	no	no				no		no	no		yes	daily	no	17-19 years	non aerated	twice or more per day	pre dominantly non veg	non-science	SDM
513	18	2	male	Non-science sstream	no	no				no		no	no		yes	daily	no	17-19 years	aerated	twice or more per day	pre dominantly non veg	non-science	SDM
514	18	2	females	Non-science sstream	no	no				yes	more than one	yes	yes	tastier	yes	never	yes	17-19 years	non aerated	once a day	predominantly veg	non-science	SDM
515	18	2	females	Non-science sstream	no	no				no		no	yes	to loose weight	yes	weekly	no	17-19 years	non aerated	once a day	predominantly veg	non-science	SDM
516	18	2	male	Non-science sstream	yes	yes	can't say	pre dinner	while studying	yes	lunch	yes	no		yes	daily	yes	17-19 years	non aerated	twice or more per day	pre dominantly non veg	non-science	SDM
517	18	2	male	Non-science sstream	yes	yes	can't say	pre dinner	while studying	yes	lunch	no	no		yes	daily	yes	17-19 years	non aerated	twice or more per day	pre dominantly non veg	non-science	SDM
518	17	2	females	Non-science sstream	yes	yes	twice a day	tea time	while watching tv	no		no	no		yes	never	yes	17-19 years	aerated	twice or more per day	predominantly veg	non-science	SDM
519	17	2	females	Non-science sstream	yes	yes	once a day	post dinner	while studying	no		yes	no		yes	daily	yes	17-19 years	non aerated	once a day	pre dominantly non veg	non-science	SDM
520	18	2	females	Non-science sstream	yes	yes	twice a day	tea time	while watching tv	no		no	no		yes	daily	yes	17-19 years	non aerated	twice or more per day	pre dominantly non veg	non-science	SDM
521	18	2	male	Non-science sstream	no	no				yes	breakfast	yes	yes	tastier	yes	weekly	yes	17-19 years	non aerated	once a day	pre dominantly non veg	non-science	SDM
522	19	2	male	Non-science sstream	no	no				yes	breakfast	yes	yes	tastier	yes	never	yes	17-19 years	aerated	once a day	predominantly veg	non-science	SDM
523	18	2	females	Non-science sstream	yes	yes	twice a day	tea time	while watching tv	yes	dinner	no	no		yes	never	yes	17-19 years	non aerated	twice or more per day	pre dominantly non veg	non-science	SDM
524	18	2	females	Non-science sstream	no	no				yes	more than one	no	yes	to loose weight	no	never	no	17-19 years	non aerated	once a day	predominantly veg	non-science	SDM
525	20	2	male	Non-science sstream	yes	yes	once a day	pre dinner	hanging out with frds	yes	breakfast	yes	no		no	never	yes	20-22 years	non aerated	once a day	pre dominantly non veg	non-science	SDM
526	20	2	male	Non-science sstream	no	no				yes	lunch	no	no		yes	weekly	yes	20-22 years	non aerated	twice or more per day	pre dominantly non veg	non-science	SDM
527	18	2	females	Non-science sstream	yes	yes	can't say	tea time	while watching tv	yes	lunch	no	yes	tastier	no	never	yes	17-19 years	non aerated	twice or more per day	pre dominantly non veg	non-science	SDM
528	19	2	females	Non-science sstream	yes	yes	can't say	tea time	while studying	no		yes	no		yes	never	yes	17-19 years	non aerated	twice or more per day	pre dominantly non veg	non-science	SDM
529	18	2	females	Non-science sstream	no	no				no		no	no		yes	never	yes	17-19 years	non aerated	twice or more per day	pre dominantly non veg	non-science	SDM
530	18	2	females	Non-science sstream	yes	yes	can't say	tea time	while studying	yes	lunch	yes	no		yes	daily	yes	17-19 years	non aerated	twice or more per day	predominantly veg	non-science	SDM
531	19	2	females	Non-science sstream	yes	yes	can't say	pre dinner	while watching tv	yes	lunch	yes	yes	tastier	yes	never	yes	17-19 years	aerated	twice or more per day	pre dominantly non veg	non-science	SDM
532	19	2	females	Non-science sstream	yes	yes	twice a day	tea time	hanging out with frds	yes	dinner	no	no		yes	daily	yes	17-19 years	non aerated	twice or more per day	pre dominantly non veg	non-science	SDM
533	19	2	females	Non-science sstream	yes	yes	once a day	tea time	while studying	yes	breakfast	no	yes	tastier	yes	weekly	yes	17-19 years	non aerated	once a day	pre dominantly non veg	non-science	SDM
534	19	2	females	Non-science sstream	yes	yes	twice a day	tea time	while watching tv	yes	dinner	no	yes	tastier	yes	weekly	yes	17-19 years	aerated	twice or more per day	predominantly veg	non-science	SDM
535	18	2	females	Non-science sstream	yes	yes	once a day	tea time	while watching tv	yes	breakfast	no	no		yes	weekly	no	17-19 years	aerated	once a day	pre dominantly non veg	non-science	SDM
536	18	2	male	Non-science sstream	no	no				no		no	yes	more convenient	yes	daily	yes	17-19 years	aerated	twice or more per day	predominantly veg	non-science	SDM
537	18	2	male	Non-science sstream	no	no				yes	breakfast	no	yes	tastier	yes	never	yes	17-19 years	non aerated	twice or more per day	pre dominantly non veg	non-science	SDM
538	18	2	male	Non-science sstream	no	no				no		no	no		yes	weekly	yes	17-19 years	aerated	once a day	pre dominantly non veg	non-science	SDM
539	19	2	females	Non-science sstream	no	no				no		no	yes	tastier	yes	never	yes	17-19 years	non aerated	twice or more per day	predominantly veg	non-science	SDM
540	18	2	females	Non-science sstream	yes	yes	once a day	tea time	hanging out with frds	no		no	no		yes	daily	no	17-19 years	non aerated	once a day	predominantly veg	non-science	SDM
541	18	2	females	Non-science sstream	no	no				yes	breakfast	no	no		yes	never	yes	17-19 years	aerated	twice or more per day	predominantly veg	non-science	SDM
542	18	2	females	Non-science sstream	no	no				no		no	no		yes	never	no	17-19 years	non aerated	twice or more per day	pre dominantly non veg	non-science	SDM
543	17	2	females	Non-science sstream	yes	yes	can't say	tea time	while watching tv	no		no	no		yes	daily	yes	17-19 years	non aerated	twice or more per day	pre dominantly non veg	non-science	SDM
544	19	2	male	Non-science sstream	no	no				no		no	yes	tastier	yes	never	yes	17-19 years	aerated	twice or more per day	predominantly veg	non-science	SDM
545	18	2	females	Non-science sstream	yes	yes	twice a day	tea time	while studying	yes	lunch	yes	no		yes	never	yes	17-19 years	non aerated	twice or more per day	pre dominantly non veg	non-science	SDM
546	18	2	females	Non-science sstream	yes	yes	can't say	tea time	hanging out with frds	yes	dinner	no	no		yes	never	yes	17-19 years	non aerated	twice or more per day	pre dominantly non veg	non-science	SDM
547	18	2	male	Non-science sstream	yes	yes	can't say	tea time	while studying	yes	lunch	no	no		yes	weekly	yes	17-19 years	non aerated	twice or more per day	pre dominantly non veg	non-science	SDM
548	19	2	male	Non-science sstream	yes	yes	can't say	mid morning	while studying	yes	lunch	yes	yes	tastier	no	never	yes	17-19 years	aerated	twice or more per day	pre dominantly non veg	non-science	SDM
549	18	2	male	Non-science sstream	yes	yes	twice a day	mid morning	while watching tv	yes	lunch	no	yes	tastier	yes	daily	yes	17-19 years	aerated	twice or more per day	pre dominantly non veg	non-science	SDM
550	18	2	females	Non-science sstream	no	no				no		no	yes	tastier	yes	never	yes	17-19 years	non aerated	twice or more per day	predominantly veg	non-science	SDM
551	18	2	male	Non-science sstream	yes	yes	can't say	tea time	while studying	yes	lunch	no	yes	tastier	yes	weekly	yes	17-19 years	aerated	twice or more per day	pre dominantly non veg	non-science	SDM
552	18	2	male	Non-science sstream	no	no				no		no	yes	more convenient	yes	daily	no	17-19 years	non aerated	twice or more per day	pre dominantly non veg	non-science	SDM
553	21	2	male	Non-science sstream	yes	yes	can't say	tea time	while watching tv	no		yes	yes	tastier	yes	weekly	yes	20-22 years	non aerated	twice or more per day	pre dominantly non veg	non-science	SDM
554	17	2	male	Non-science sstream	yes	yes	twice a day	tea time	while studying	no		no	no		yes	daily	yes	17-19 years	non aerated	twice or more per day	pre dominantly non veg	non-science	SDM
555	19	2	male	Non-science sstream	no	no				no		no	no		yes	daily	no	17-19 years	non aerated	twice or more per day	pre dominantly non veg	non-science	SDM
556	18	2	male	Non-science sstream	yes	yes	can't say	tea time	while watching tv	no		no	no		yes	never	yes	17-19 years	non aerated	twice or more per day	pre dominantly non veg	non-science	SDM
557	18	2	male	Non-science sstream	yes	yes	can't say	tea time	others	no		no	yes	tastier	yes	daily	yes	17-19 years	non aerated	twice or more per day	predominantly veg	non-science	SDM
558	18	2	male	Non-science sstream	no	no				no		yes	yes	tastier	yes	daily	yes	17-19 years	non aerated	once a day	pre dominantly non veg	non-science	SDM
559	19	2	male	Non-science sstream	no	no				no		no	no		yes	daily	yes	17-19 years	non aerated	once a day	pre dominantly non veg	non-science	SDM
560	18	2	male	Non-science sstream	no	no				no		no	no		yes	daily	yes	17-19 years	non aerated	once a day	pre dominantly non veg	non-science	SDM
561	18	2	male	Non-science sstream	no	no				no		no	no	tastier	yes	daily	yes	17-19 years	aerated	once a day	pre dominantly non veg	non-science	SDM
562	18	2	male	Non-science sstream	no	no				no		no	no	to loose weight	yes	daily	no	17-19 years	non aerated	once a day	predominantly veg	non-science	SDM
563	20	2	male	Non-science sstream	yes	yes	can't say		while studying	no		no	yes	tastier	no	never	no	20-22 years	aerated	twice or more per day	pre dominantly non veg	non-science	SDM
564	18	2	male	Non-science sstream	no	no				no		yes	no	tastier	yes	never		17-19 years	non aerated	twice or more per day	pre dominantly non veg	non-science	SDM
565	18	2	females	Non-science sstream	no	no				no		no	yes		yes		yes	17-19 years	non aerated	once a day	pre dominantly non veg	non-science	SDM
566	18	2	male	Science stream	no	no				no		no	no	tastier	no	never	yes	17-19 years	non aerated	once a day	predominantly veg	science	SDM
567	19	2	females	Science stream	no	no				no		no	no	tastier	no	daily	no	17-19 years	non aerated	once a day	pre dominantly non veg	science	SDM
568	18	2	females	Science stream	yes	yes	can't say	tea time	while watching tv	yes	lunch	yes	no	to loose weight	yes	never	yes	17-19 years	aerated	twice or more per day	pre dominantly non veg	science	SDM
569	18	2	females	Science stream	no	no				no		no	yes	tastier	no	never	yes	17-19 years	non aerated	twice or more per day	pre dominantly non veg	science	SDM
570	18	2	females	Science stream	yes	yes	can't say	tea time	while studying	yes	breakfast	no	no		yes	never	yes	17-19 years	aerated	twice or more per day	pre dominantly non veg	science	SDM
571	19	2	male	Non-science sstream	no	no				yes	lunch	yes	no	tastier	no	never	yes	17-19 years	aerated	once a day	pre dominantly non veg	non-science	SDM
572	18	2	male	Non-science sstream	yes	yes	twice a day	tea time	while watching tv	no		no	no	more convenient	yes	weekly	no	17-19 years	aerated	twice or more per day	pre dominantly non veg	non-science	SDM
573	19	2	male	Non-science sstream	yes	yes	twice a day	tea time	while watching tv	yes	breakfast	no	no	tastier	yes	weekly	yes	17-19 years	aerated	twice or more per day	pre dominantly non veg	non-science	SDM
574	19	2	male	Non-science sstream	no	no				no		yes	yes		yes	never	no	17-19 years	aerated	twice or more per day	pre dominantly non veg	non-science	SDM
575	20	2	male	Non-science sstream	yes	yes	twice a day	tea time	while studying	yes	lunch	no	no	more convenient	no	daily	yes	20-22 years	aerated	twice or more per day	pre dominantly non veg	non-science	SDM
576	19	2	male	Non-science sstream	yes	yes	can't say	post dinner	while watching tv	no		no	yes	tastier	yes	daily	yes	17-19 years	aerated	twice or more per day	pre dominantly non veg	non-science	SDM
577	19	2	male	Non-science sstream	yes	yes	once a day	tea time	while studying	yes	lunch	yes	no	tastier	yes	daily	yes	17-19 years	aerated	once a day	predominantly veg	non-science	SDM
578	17	2	females	Non-science sstream	yes	yes	can't say	tea time	while watching tv	yes	breakfast	no	no	tastier	yes	daily	yes	17-19 years	non aerated	twice or more per day	predominantly veg	non-science	SDM
579	18	2	females	Non-science sstream	no	no				yes	breakfast	no	no	tastier	no	never	yes	17-19 years	aerated	twice or more per day	pre dominantly non veg	non-science	SDM
580	18	2	females	Non-science sstream	yes	yes	can't say	tea time	while watching tv	yes	breakfast	no	no	tastier	yes	daily	no	17-19 years	non aerated	twice or more per day	pre dominantly non veg	non-science	SDM
581	18	2	male	Non-science sstream	no	no				no		no	no	tastier	yes	daily	no	17-19 years	non aerated	once a day	predominantly veg	non-science	SDM
582	18	2	male	Non-science sstream	no	no				no		no	no	to loose weight	yes	weekly	no	17-19 years	non aerated	twice or more per day	predominantly veg	non-science	SDM
583	18	2	male	Non-science sstream	yes	yes	can't say	tea time	while watching tv	no		no	no		no	weekly	yes	17-19 years	non aerated	twice or more per day	predominantly veg	non-science	SDM
584	17	2	females	Non-science sstream	no	no				yes	breakfast	no	no		yes	weekly	yes	17-19 years	aerated	once a day	predominantly veg	non-science	SDM
585	18	2	females	Non-science sstream	yes	yes	can't say	tea time	hanging out with frds	no		yes	yes	tastier	yes	never	yes	17-19 years	non aerated	twice or more per day	pre dominantly non veg	non-science	SDM
586	18	2	females	Non-science sstream	no	no				yes		no	no	tastier	yes	never	no	17-19 years	non aerated	once a day	predominantly veg	non-science	SDM
587	18	2	females	Non-science sstream	yes	yes	once a day	tea time	while studying	yes	dinner	no	no		yes	weekly	yes	17-19 years	non aerated	once a day	pre dominantly non veg	non-science	SDM
588	18	2	females	Non-science sstream	yes	yes	can't say	tea time	while watching tv	yes	more than one	no	no	tastier	yes	weekly	yes	17-19 years	aerated	twice or more per day	predominantly veg	non-science	SDM
589	18	2	male	Non-science sstream	no	no				no		no	no	tastier	no	weekly	yes	17-19 years	non aerated	once a day	predominantly veg	non-science	SDM
590	18	2	male	Non-science sstream	no	no				no		yes	no		yes	daily	no	17-19 years	non aerated	once a day	predominantly veg	non-science	SDM
591	18	2	females	Non-science sstream	yes	yes	can't say	tea time	hanging out with frds	yes	dinner	no	no	tastier	yes	never	no	17-19 years	non aerated	twice or more per day	pre dominantly non veg	non-science	SDM
592	18	2	females	Non-science sstream	yes	yes	can't say	tea time	while watching tv	yes	lunch	no	no	tastier	yes	never	no	17-19 years	non aerated	twice or more per day	pre dominantly non veg	non-science	SDM
593	18	2	females	Non-science sstream	yes	yes	can't say	mid morning	while watching tv	no		no	no		yes	weekly	yes	17-19 years	non aerated	twice or more per day	pre dominantly non veg	non-science	SDM
594	18	2	females	Non-science sstream	yes	yes	can't say	tea time	while studying	yes	lunch	no	no		yes	weekly	yes	17-19 years	non aerated	twice or more per day	predominantly veg	non-science	SDM
595	18	2	females	Non-science sstream	no	no				yes	lunch	yes	yes	tastier	yes	never	yes	17-19 years	aerated	twice or more per day	predominantly veg	non-science	SDM
596	18	2	females	Non-science sstream	yes	yes	can't say	pre dinner	while watching tv	no		no	no		yes	never	no	17-19 years	non aerated	twice or more per day	predominantly veg	non-science	SDM
597	19	2	females	Non-science sstream	yes	yes	can't say	tea time	while watching tv	no		no	no		yes	never	no	17-19 years	non aerated	twice or more per day	pre dominantly non veg	non-science	SDM
598	18	2	females	Non-science sstream	yes	yes	twice a day	tea time	while watching tv	yes	more than one	yes	no		no	never	no	17-19 years	aerated	twice or more per day	predominantly veg	non-science	SDM
599	18	2	females	Non-science sstream	yes	yes	twice a day	tea time	while watching tv	no		no	no	tastier	yes	weekly	yes	17-19 years	non aerated	twice or more per day	predominantly veg	non-science	SDM
600	18	2	females	Non-science sstream	no	no				no		no	no		yes	never	yes	17-19 years	non aerated	twice or more per day	predominantly veg	non-science	SDM
601	18	2	females	Non-science sstream	yes	yes	can't say	tea time	while watching tv	yes	dinner	no	no		yes	daily	yes	17-19 years	non aerated	twice or more per day	predominantly veg	non-science	SDM
602	18	2	females	Non-science sstream	yes	yes	can't say	tea time	while watching tv	yes	breakfast	no	yes	tastier	yes	never	yes	17-19 years	aerated	twice or more per day	pre dominantly non veg	non-science	SDM
603	18	2	females	Non-science sstream	yes	yes	thrice a day	tea time	others	no		no	yes	tastier	yes	never	yes	17-19 years	aerated	twice or more per day	predominantly veg	non-science	SDM
604	18	2	females	Non-science sstream	no	no				yes	dinner	no	no		yes	weekly	no	17-19 years	non aerated	once a day	predominantly veg	non-science	SDM
605	18	2	females	Non-science sstream	no	no				yes	dinner	no	no		yes	never	no	17-19 years	non aerated	twice or more per day	predominantly veg	non-science	SDM
606	19	2	females	Non-science sstream	no	no				no		no	no		yes	never	no	17-19 years	non aerated	twice or more per day	pre dominantly non veg	non-science	SDM
607	18	2	females	Non-science sstream	yes	yes	twice a day	tea time	while watching tv	yes	breakfast	no	yes	tastier	yes	weekly	yes	17-19 years	non aerated	twice or more per day	pre dominantly non veg	non-science	SDM
608	18	2	females	Non-science sstream	yes	yes	thrice a day	tea time	while watching tv	no		no	yes	more convenient	yes	weekly	yes	17-19 years	aerated	twice or more per day	predominantly veg	non-science	SDM
609	18	2	females	Non-science sstream	no	no				no		yes	no	more convenient	no		no	17-19 years	aerated	twice or more per day	pre dominantly non veg	non-science	SDM
610	18	2	females	Non-science sstream	yes	yes	can't say	tea time	while watching tv	no		no	no		yes	never	yes	17-19 years	aerated	twice or more per day	predominantly veg	non-science	SDM
611	18	2	females	Non-science sstream	yes	yes	can't say	tea time	while watching tv	yes	lunch	no	no		yes	weekly	yes	17-19 years	aerated	twice or more per day	pre dominantly non veg	non-science	SDM
612	18	2	females	Non-science sstream	yes	yes	can't say	tea time	while watching tv	no		no	no		yes	never	no	17-19 years	aerated	twice or more per day	pre dominantly non veg	non-science	SDM
613	18	2	females	Non-science sstream	yes	yes	can't say	tea time	hanging out with frds	yes	dinner	yes	yes	tastier	yes	daily	yes	17-19 years	non aerated	twice or more per day	pre dominantly non veg	non-science	SDM
614	18	2	females	Non-science sstream	yes	yes	can't say	tea time	while watching tv	yes	breakfast	no	yes	tastier	yes	daily	yes	17-19 years	aerated	twice or more per day	pre dominantly non veg	non-science	SDM
615	18	2	male	Non-science sstream	no	no				yes	breakfast	yes	no	more convenient	yes	weekly	yes	17-19 years	non aerated	twice or more per day	pre dominantly non veg	non-science	SDM
616	18	2	male	Non-science sstream	no	no				yes	breakfast	yes	no	more convenient	yes	weekly	no	17-19 years	non aerated	twice or more per day	pre dominantly non veg	non-science	SDM
617	18	2	male	Non-science sstream	no	no				yes	lunch	no	no		yes	daily	yes	17-19 years	non aerated	twice or more per day	pre dominantly non veg	non-science	SDM
618	18	2	male	Non-science sstream	no	no				yes	lunch	no	yes	to loose weight	yes	daily	no	17-19 years	non aerated	twice or more per day	pre dominantly non veg	non-science	SDM
619	18	2	male	Non-science sstream	yes	yes	twice a day	tea time	while studying	yes	breakfast	no	no		no	never	yes	17-19 years	aerated	twice or more per day	pre dominantly non veg	non-science	SDM
620	18	2	male	Non-science sstream	yes	yes	twice a day	tea time	while watching tv	yes	dinner	no	no		yes	never	yes	17-19 years	non aerated	twice or more per day	pre dominantly non veg	non-science	SDM
621	18	2	male	Non-science sstream	yes	yes	can't say	tea time	while studying	no		no	yes	tastier	no	never	yes	17-19 years	aerated	twice or more per day	pre dominantly non veg	non-science	SDM
622	18	2	male	Non-science sstream	yes	yes	can't say	tea time	while watching tv	yes	lunch	yes	no		no	never	yes	17-19 years	aerated	twice or more per day	pre dominantly non veg	non-science	SDM
623	18	2	male	Non-science sstream	yes	yes	can't say	tea time	while watching tv	yes	more than one	no	yes	tastier	no	never	yes	17-19 years	non aerated	twice or more per day	pre dominantly non veg	non-science	SDM
624	18	2	male	Non-science sstream	yes	yes	can't say	tea time	while studying	no		no	no	more convenient	yes	never	yes	17-19 years	non aerated	twice or more per day	pre dominantly non veg	non-science	SDM
625	18	2	male	Non-science sstream	yes	yes	can't say	mid morning	while studying	yes	more than one	no	no	tastier	yes	never	yes	17-19 years	non aerated	twice or more per day	pre dominantly non veg	non-science	SDM
626	18	2	male	Non-science sstream	yes	yes	can't say	tea time	while watching tv	yes	breakfast	no	yes	tastier	yes	never	yes	17-19 years	aerated	twice or more per day	pre dominantly non veg	non-science	SDM
627	18	2	male	Non-science sstream	no	no				no		no	no	to loose weight	yes	daily	yes	17-19 years	non aerated	twice or more per day	predominantly veg	non-science	SDM
628	18	2	male	Non-science sstream	no	no				yes	lunch	no	no	tastier	yes	daily	yes	17-19 years	non aerated	twice or more per day	predominantly veg	non-science	SDM
629	20	2	male	Non-science sstream	no	no				no		no	no	tastier	yes	daily	no	20-22 years	aerated	once a day	predominantly veg	non-science	SDM
630	18	2	male	Non-science sstream	no	no				no		no	no	tastier	yes	never	no	17-19 years	non aerated	once a day	predominantly veg	non-science	SDM
631	19	2	male	Non-science sstream	yes	yes	can't say	tea time	while watching tv	yes	breakfast	yes	no	tastier	yes	weekly	yes	17-19 years	aerated	twice or more per day	pre dominantly non veg	non-science	SDM
632	19	2	male	Non-science sstream	yes	yes	twice a day		while studying	yes	dinner	no	no	tastier	yes	never	yes	17-19 years	aerated	twice or more per day	pre dominantly non veg	non-science	SDM
633	18	2	male	Non-science sstream	no	no				yes	breakfast	no	yes	tastier	no	never	no	17-19 years	aerated	once a day	predominantly veg	non-science	SDM
634	19	2	male	Non-science sstream	no	no				yes	lunch	no	yes	to loose weight	yes	weekly	no	17-19 years	aerated	once a day	predominantly veg	non-science	SDM
635	18	2	male	Non-science sstream	no	no				yes	breakfast	yes	yes	tastier		weekly	no	17-19 years	aerated	once a day	predominantly veg	non-science	SDM
636	18	2	male	Non-science sstream	no	no				no		no	no		yes	never	no	17-19 years	non aerated	once a day	predominantly veg	non-science	SDM
637	19	2	male	Non-science sstream	no	no				no		no	no		no	daily	yes	17-19 years	aerated	twice or more per day	pre dominantly non veg	non-science	SDM
638	19	2	male	Non-science sstream	yes	yes	can't say	pre dinner	while watching tv	no		yes	yes		no	never	yes	17-19 years	aerated	twice or more per day	pre dominantly non veg	non-science	SDM
639	18	2	male	Non-science sstream	no	no				no		no	no	tastier	no	never	no	17-19 years	non aerated	twice or more per day	predominantly veg	non-science	SDM
640	19	2	male	Non-science sstream	no	no				no		no	no			weekly	yes	17-19 years	aerated	twice or more per day	pre dominantly non veg	non-science	SDM
641	20	2	male	Non-science sstream	no	no				yes	lunch	no	no		no	weekly	yes	20-22 years	non aerated	twice or more per day	pre dominantly non veg	non-science	SDM
642	19	2	male	Non-science sstream	yes	yes	thrice a day	mid morning	while studying	no		no	no	tastier	yes	daily	yes	17-19 years	aerated	twice or more per day	pre dominantly non veg	non-science	SDM
643	19	2	male	Non-science sstream	no	no				yes	dinner	no	no	tastier	yes	never	yes	17-19 years	non aerated	twice or more per day	pre dominantly non veg	non-science	SDM
644	20	2	male	Non-science sstream	yes	yes	can't say	pre dinner	while studying	yes	breakfast	yes	no	more convenient	yes	daily	yes	20-22 years	non aerated	twice or more per day	pre dominantly non veg	non-science	SDM
645	18	2	male	Non-science sstream	yes	yes	can't say	mid morning	while watching tv	yes	lunch	no	yes	tastier	no	never	yes	17-19 years	aerated	twice or more per day	predominantly veg	non-science	SDM
646	18	2	male	Non-science sstream	no	no				yes	breakfast	no	no	tastier	yes	never	yes	17-19 years	non aerated	twice or more per day	pre dominantly non veg	non-science	SDM
647	18	2	male	Non-science sstream	no	no				no		no	no		yes	daily	yes	17-19 years	non aerated	twice or more per day	pre dominantly non veg	non-science	SDM
648	19	2	male	Non-science sstream	no	no				yes	breakfast	yes	yes	tastier	no	daily	yes	17-19 years	non aerated	once a day	pre dominantly non veg	non-science	SDM
649	19	2	male	Non-science sstream	yes	yes	can't say	mid morning	while watching tv	yes	lunch	no	yes	tastier	no	never	yes	17-19 years	aerated	twice or more per day	pre dominantly non veg	non-science	SDM
650	19	2	male	Non-science sstream	no	no				yes	breakfast	yes	yes	tastier	yes	daily	no	17-19 years	non aerated	twice or more per day	pre dominantly non veg	non-science	SDM
651	19	2	male	Non-science sstream	no	no				no		no	no		yes	daily	no	17-19 years	non aerated	once a day	predominantly veg	non-science	SDM
652	18	2	male	Non-science sstream	no	no				no		no	yes	tastier	yes	never	yes	17-19 years	aerated	twice or more per day	predominantly veg	non-science	SDM
653	18	2	male	Non-science sstream	yes	yes	once a day	pre dinner	while watching tv	yes	breakfast	no	no	tastier	no	daily	yes	17-19 years	aerated	once a day	pre dominantly non veg	non-science	SDM
654	19	2	male	Non-science sstream	no	no				yes	lunch	no	no	tastier	yes	never	yes	17-19 years	non aerated	twice or more per day	pre dominantly non veg	non-science	SDM
655	18	2	male	Non-science sstream	yes	yes	once a day	tea time	while studying	yes		yes	yes		yes	daily	yes	17-19 years	non aerated	once a day	predominantly veg	non-science	SDM
656	18	2	male	Non-science sstream	yes	yes	thrice a day	tea time	while watching tv	yes	lunch	no	no		yes	weekly	no	17-19 years	non aerated	twice or more per day	pre dominantly non veg	non-science	SDM
657	18	2	male	Non-science sstream	no	no				no		no	no		yes	daily	yes	17-19 years	non aerated	twice or more per day	pre dominantly non veg	non-science	SDM
658	18	2	male	Non-science sstream	yes	yes	can't say	tea time	while watching tv	no		no	no	tastier	yes	daily	no	17-19 years	non aerated	twice or more per day	pre dominantly non veg	non-science	SDM
659	18	2	male	Non-science sstream	yes	yes	twice a day	tea time	while watching tv	no		no	no		yes	daily	no	17-19 years	non aerated	twice or more per day	pre dominantly non veg	non-science	SDM
660	18	2	male	Non-science sstream	yes	yes	twice a day	tea time	while watching tv	no		no	no	tastier	yes	daily	no	17-19 years	non aerated	twice or more per day	pre dominantly non veg	non-science	SDM
661	18	2	male	Non-science sstream	no	no				yes	lunch	no	no			daily	yes	17-19 years	aerated	twice or more per day	pre dominantly non veg	non-science	SDM
662	18	2	females	Non-science sstream	no	no				yes	lunch	yes	no		no	never	yes	17-19 years	non aerated	once a day	predominantly veg	non-science	SDM
663	18	2	females	Non-science sstream	yes	yes	can't say	pre dinner	while studying	yes	more than one	yes	yes	tastier	no	weekly	yes	17-19 years	non aerated	twice or more per day	pre dominantly non veg	non-science	SDM
664	18	2	females	Non-science sstream	no	no				yes	breakfast	no	no		yes	never	no	17-19 years	non aerated	once a day	pre dominantly non veg	non-science	SDM
665	18	2	females	Science stream	no	no				yes	more than one	no	no		yes	daily	yes	17-19 years	non aerated	once a day	predominantly veg	science	SDM
666	18	2	females	Science stream	no	no				no		no	no			daily	yes	17-19 years	non aerated	once a day	predominantly veg	science	SDM
667	19	2	females	Science stream	no	no				yes	more than one	no	no		yes	weekly	yes	17-19 years	non aerated	once a day	predominantly veg	science	SDM
668	19	2	females	Science stream	no	no				no		no	no		yes	weekly	yes	17-19 years	non aerated	once a day	pre dominantly non veg	science	SDM
669	19	2	females	Science stream	yes	yes	twice a day	tea time	while watching tv	yes	lunch	no	yes	to loose weight	no	daily	yes	17-19 years	aerated	twice or more per day	pre dominantly non veg	science	SDM
670	18	2	females	Science stream	no	no				yes	breakfast	yes	yes	tastier	yes	daily	yes	17-19 years	non aerated	twice or more per day	pre dominantly non veg	science	SDM
671	18	2	females	Science stream	yes	yes	once a day	tea time	while watching tv	no		yes	yes	tastier	yes	daily	yes	17-19 years	non aerated	once a day	pre dominantly non veg	science	SDM
672	18	2	females	Science stream	no	no				yes	dinner	yes	no		yes	never	yes	17-19 years	non aerated	once a day	pre dominantly non veg	science	SDM
673	18	2	females	Science stream	yes	yes	once a day	tea time	while watching tv	yes	dinner	no	no		yes	never	no	17-19 years	non aerated	once a day	predominantly veg	science	SDM
674	18	2	females	Science stream	yes	yes	can't say	tea time	while watching tv	no		no	yes	tastier	yes	never	yes	17-19 years	aerated	twice or more per day	pre dominantly non veg	science	SDM
675	18	2	females	Science stream	no	no				yes	breakfast	no	yes	tastier	yes	never	yes	17-19 years	non aerated	twice or more per day	predominantly veg	science	SDM
676	18	2	females	Science stream	no	no				no		no	no	tastier	yes	weekly	no	17-19 years	non aerated	twice or more per day	predominantly veg	science	SDM
677	18	2	females	Science stream	no	no				no		no	no		yes	never	yes	17-19 years	non aerated	twice or more per day	pre dominantly non veg	science	SDM
678	19	2	male	Science stream	no	no				yes	dinner	yes	yes		yes	daily	no	17-19 years	aerated	once a day	pre dominantly non veg	science	SDM
679	17	2	male	Science stream	yes	yes	can't say	tea time	hanging out with frds	no		no	no		yes	never	yes	17-19 years	aerated	twice or more per day	pre dominantly non veg	science	SDM
680	18	2	male	Science stream	yes	yes	twice a day	tea time	while studying	no		no	no		yes	daily	yes	17-19 years	non aerated	twice or more per day	pre dominantly non veg	science	SDM
681	18	2	male	Science stream	no	no				no		no	no		yes	never	no	17-19 years	non aerated	once a day	pre dominantly non veg	science	SDM
682	18	2	male	Science stream	no	no				no		yes	no		yes	weekly	no	17-19 years	non aerated	once a day	pre dominantly non veg	science	SDM
683	18	2	male	Science stream	no	no				no		no	no	tastier	yes	daily	yes	17-19 years	non aerated	once a day	pre dominantly non veg	science	SDM
684	20	2	male	Science stream	yes	yes	once a day	tea time	while watching tv	yes	breakfast	no	no		yes	never	yes	20-22 years	aerated	once a day	predominantly veg	science	SDM
685	18	2	male	Science stream	no	no				yes	lunch	no	no		no	never	yes	17-19 years	non aerated	once a day	pre dominantly non veg	science	SDM
686	19	2	male	Science stream	yes	yes	can't say	tea time	others	yes	breakfast	no			yes	never	no	17-19 years	non aerated	twice or more per day	predominantly veg	science	SDM
687	18	2	male	Science stream	no	no				no		no	no	tastier	no	never	yes	17-19 years	non aerated	twice or more per day	pre dominantly non veg	science	SDM
688	19	2	male	Science stream	no	no				no		no	no	tastier	no	never	yes	17-19 years	aerated	once a day	pre dominantly non veg	science	SDM
689	18	2	male	Science stream	yes	yes	twice a day	tea time	while watching tv	yes	dinner	no	no		no	daily	yes	17-19 years	aerated	twice or more per day	predominantly veg	science	SDM
690	18	2	male	Science stream	no	no				yes	dinner	no	no		no	daily	yes	17-19 years	non aerated	once a day	pre dominantly non veg	science	SDM
691	19	2	male	Science stream	yes	yes	can't say	tea time	hanging out with frds	yes	lunch	no	no		yes	daily	no	17-19 years	non aerated	twice or more per day	predominantly veg	science	SDM
692	18	2	male	Science stream	no	no				yes	lunch	no	no	tastier		daily	no	17-19 years	non aerated	once a day	predominantly veg	science	SDM
693	18	2	male	Science stream	no	no				no		yes	yes	to loose weight	no	daily	no	17-19 years	non aerated	twice or more per day	pre dominantly non veg	science	SDM
694	20	2	male	Science stream	no	no				no		no	no	tastier	yes	daily	yes	20-22 years	non aerated	twice or more per day	predominantly veg	science	SDM
695	18	2	male	Science stream	yes	yes	twice a day	tea time	others	no		yes	yes	tastier		daily	yes	17-19 years	non aerated	twice or more per day	pre dominantly non veg	science	SDM
696	18	2	male	Science stream	no	no				no		yes	yes	tastier	no	daily	yes	17-19 years	non aerated	twice or more per day	pre dominantly non veg	science	SDM
697	18	2	females	Science stream	yes	yes	can't say	tea time	while studying	yes	more than one	no	yes	tastier	yes	daily	yes	17-19 years	non aerated	twice or more per day	pre dominantly non veg	science	SDM
698	18	2	females	Science stream	no	no				no		no	no		yes	daily	no	17-19 years	non aerated	twice or more per day	predominantly veg	science	SDM
699	18	2	females	Science stream	yes	yes	twice a day	tea time	while watching tv	no		no	no		yes	daily	yes	17-19 years	non aerated	twice or more per day	pre dominantly non veg	science	SDM
700	18	2	male	Science stream	no	no				yes	dinner	no	no	tastier	yes	never	no	17-19 years	aerated	once a day	pre dominantly non veg	science	SDM
701	18	2	male	Science stream	yes	yes	can't say	pre dinner	while watching tv	no		no	no	tastier	no	daily	yes		non aerated	twice or more per day	pre dominantly non veg	science	SDM
702	18	2	male	Science stream	yes	yes	can't say	pre dinner	while watching tv	yes	breakfast	no	no		no	never	no	17-19 years	aerated	twice or more per day	pre dominantly non veg	science	SDM
703	19	2	male	Science stream	no	no				no		no	no	tastier	no	daily	no	17-19 years	non aerated	twice or more per day	pre dominantly non veg	science	SDM
704	18	2	male	Science stream	no	no				no		no	no	tastier	no	daily	yes	17-19 years	non aerated	twice or more per day	pre dominantly non veg	science	SDM
705	18	2	male	Science stream	yes	yes	can't say	tea time	hanging out with frds	yes	lunch	no	no		yes	daily	yes	17-19 years	aerated	twice or more per day	pre dominantly non veg	science	SDM
706	18	2	male	Science stream	yes	yes	can't say	pre dinner	while watching tv	no		no	no			daily	yes	17-19 years	non aerated	twice or more per day	predominantly veg	science	SDM
707	18	2	male	Science stream	yes	yes	can't say	tea time	while watching tv	no		no	no	tastier	yes	never	yes	17-19 years	non aerated	twice or more per day	pre dominantly non veg	science	SDM
708	18	2	male	Science stream	yes	yes	once a day	pre dinner	while watching tv	yes	breakfast	no	no	tastier	yes	daily	no	17-19 years	non aerated	once a day	predominantly veg	science	SDM
709	18	2	male	Science stream	no	no				no		no	yes	tastier	no	daily	no	17-19 years	non aerated	once a day	predominantly veg	science	SDM
710	18	2	male	Science stream	yes	yes	once a day	tea time	while watching tv	no		yes	yes	tastier	yes	daily	yes	17-19 years	non aerated	once a day	pre dominantly non veg	science	SDM
711	18	2	male	Science stream	no	no				yes	lunch	no	no	tastier	no	weekly	yes	17-19 years	non aerated	twice or more per day	predominantly veg	science	SDM
712	18	2	male	Science stream	no	no				no		no	no		yes	daily	yes	17-19 years	non aerated	twice or more per day	pre dominantly non veg	science	SDM
713	18	2	females	Science stream	no	no				no		yes	yes		yes	weekly	yes	17-19 years	non aerated	twice or more per day	pre dominantly non veg	science	SDM
714	18	2	females	Science stream	no	no				no		no	no		yes	weekly	yes	17-19 years	non aerated	twice or more per day	pre dominantly non veg	science	SDM
715	18	2	females	Science stream	no	no				no		no	no		yes	weekly	yes	17-19 years	non aerated	twice or more per day	pre dominantly non veg	science	SDM
716	18	2	females	Science stream	no	no				yes	lunch	no	no		yes	daily	yes	17-19 years	non aerated	twice or more per day	predominantly veg	science	SDM
717	18	2	male	Science stream	no	no				yes	breakfast	no	no	tastier	no	never	yes	17-19 years	aerated	once a day	pre dominantly non veg	science	SDM
718	19	2	male	Science stream	no	no				no		no	no	tastier	yes	daily	no	17-19 years	non aerated	twice or more per day	pre dominantly non veg	science	SDM
719	18	2	females	Science stream	no	no				no		no	no		no	never	yes	17-19 years	non aerated	once a day	predominantly veg	science	SDM
720	18	2	females	Science stream	no	no				yes	lunch	no	no	tastier	yes	never	yes	17-19 years	non aerated	twice or more per day	predominantly veg	science	SDM
721	18	2	male	Non-science sstream	yes	yes	can't say		while studying	yes	dinner	no	no		yes	daily	yes	17-19 years	non aerated	twice or more per day	predominantly veg	non-science	SDM
722	18	2	females	Non-science sstream	no	no				no		yes	no	tastier	no	never	no	17-19 years	non aerated	once a day	pre dominantly non veg	non-science	SDM
723	18	2	females	Non-science sstream	no	no				yes	dinner	no	no	tastier	yes	never	yes	17-19 years	non aerated	twice or more per day	predominantly veg	non-science	SDM
724	18	2	females	Non-science sstream	no	no				no		no	no	tastier	yes	daily	yes	17-19 years	non aerated	twice or more per day	predominantly veg	non-science	SDM
725	18	2	females	Non-science sstream	yes	yes	twice a day	tea time	while watching tv	yes	lunch	yes		tastier	yes	daily	yes	17-19 years	non aerated	twice or more per day	predominantly veg	non-science	SDM
726	18	2	male	Non-science sstream	yes	yes	can't say	mid morning	while studying	yes	dinner	yes	no		yes	daily	no	17-19 years	non aerated	twice or more per day	predominantly veg	non-science	SDM
727	17	2	male	Non-science sstream	yes	yes	can't say	tea time	while studying	yes	lunch	no	yes	tastier	yes	daily	yes	17-19 years	non aerated	twice or more per day	pre dominantly non veg	non-science	SDM
728	19	2	male	Non-science sstream	no	no				no		no	no	to loose weight	yes	never	yes	17-19 years	non aerated	twice or more per day	pre dominantly non veg	non-science	SDM
729	18	2	male	Non-science sstream	yes	yes	can't say	post dinner	while studying	no		no	yes	tastier	no	never	yes	17-19 years	aerated	twice or more per day	pre dominantly non veg	non-science	SDM
730	20	2	male	Non-science sstream	yes	yes	twice a day	mid morning	while studying	yes	more than one	no	yes	more convenient	no	never	yes	20-22 years	non aerated	twice or more per day	predominantly veg	non-science	SDM
731	20	2	male	Non-science sstream	yes	yes	twice a day	tea time	while watching tv	yes	breakfast	no	yes	tastier	yes	never	yes	20-22 years	non aerated	twice or more per day	pre dominantly non veg	non-science	SDM
732	20	2	male	Non-science sstream	no	no				no		no	no		yes	never	yes	20-22 years	non aerated	twice or more per day	pre dominantly non veg	non-science	SDM
733	20	2	male	Non-science sstream	no	no				no		yes	no		yes	daily	yes	20-22 years	non aerated	once a day	pre dominantly non veg	non-science	SDM
734	20	2	male	Non-science sstream	no	no				no		no	no		yes	daily	yes	20-22 years	non aerated	twice or more per day	predominantly veg	non-science	SDM
735	21	2	male	Non-science sstream	no	no				yes	lunch	no	no		no	never	yes	20-22 years	non aerated	twice or more per day	pre dominantly non veg	non-science	SDM
736	20	2	females	Non-science sstream	yes	yes	can't say	tea time	while studying	yes	dinner	no	no		no	never	yes	20-22 years	aerated	twice or more per day	pre dominantly non veg	non-science	SDM
737	20	2	male	Non-science sstream	yes	yes	twice a day	pre dinner	while studying	no		no	no					20-22 years	non aerated	twice or more per day	pre dominantly non veg	non-science	SDM
738	20	2	male	Non-science sstream	no	no				no		no	yes	tastier	yes	never	yes	20-22 years	aerated	once a day	predominantly veg	non-science	SDM
739	20	2	male	Non-science sstream	no	no				yes	dinner	no	yes	tastier	yes	weekly	yes	20-22 years	non aerated	once a day	predominantly veg	non-science	SDM
740	20	2	male	Non-science sstream	yes	yes	can't say	tea time	while studying	no		no	yes		yes	never	yes	20-22 years	non aerated	twice or more per day	pre dominantly non veg	non-science	SDM
741	20	2	females	Non-science sstream	yes	yes	thrice a day	tea time	while watching tv	yes	lunch	no	yes	tastier	yes	never	yes	20-22 years	non aerated	twice or more per day	predominantly veg	non-science	SDM
742	18	2	male	Non-science sstream	yes	yes	can't say	tea time	while watching tv	no		no	no		yes	daily		17-19 years	non aerated	twice or more per day	pre dominantly non veg	non-science	SDM
743	18	2	females	Non-science sstream	no	no				no		yes	yes	tastier	yes	daily	yes	17-19 years	non aerated	twice or more per day	predominantly veg	non-science	SDM
744	18	2	females	Non-science sstream	no	no				no		yes	no		yes	daily	yes	17-19 years	non aerated	twice or more per day	predominantly veg	non-science	SDM
745	18	2	females	Non-science sstream	no	no				no		no	no		no	never	yes	17-19 years	aerated	twice or more per day	pre dominantly non veg	non-science	SDM
746	18	2	females	Non-science sstream	no	no				no		no	no		no	never	yes	17-19 years	aerated	once a day	pre dominantly non veg	non-science	SDM
747	18	2	females	Non-science sstream	no	no				no		no	yes	tastier	yes	daily	yes	17-19 years	non aerated	twice or more per day	predominantly veg	non-science	SDM
748	18	2	females	Non-science sstream	no	no				no		no	yes	tastier	yes	daily	no	17-19 years	non aerated	twice or more per day	predominantly veg	non-science	SDM
749	18	2	females	Non-science sstream	no	no				yes	breakfast	no	no		yes	never	yes	17-19 years	non aerated	twice or more per day	pre dominantly non veg	non-science	SDM
750	18	2	females	Non-science sstream	no	no				no		no	no		yes	never	no	17-19 years	non aerated	twice or more per day	predominantly veg	non-science	SDM
751	18	2	females	Non-science sstream	no	no				no		no	no		yes	never	yes	17-19 years	aerated	twice or more per day	pre dominantly non veg	non-science	SDM
752	18	2	females	Non-science sstream	yes	yes	can't say	tea time	others	yes	lunch	no	no		yes	weekly	yes	17-19 years	non aerated	twice or more per day	pre dominantly non veg	non-science	SDM
753	18	2	females	Non-science sstream	no	no				no		no	no		yes	never	yes	17-19 years	non aerated	twice or more per day	pre dominantly non veg	non-science	SDM
754	18	2	females	Non-science sstream	no	no				no		no	no		no	weekly	yes	17-19 years	non aerated	once a day	pre dominantly non veg	non-science	SDM
755	18	2	females	Non-science sstream	yes	yes	twice a day	tea time	while watching tv	yes	dinner	yes	no		yes	daily	yes	17-19 years	aerated	twice or more per day	pre dominantly non veg	non-science	SDM
756	18	2	females	Non-science sstream	yes	yes	can't say	pre dinner	while watching tv	yes	breakfast	no	yes	to loose weight	yes	never	yes	17-19 years	aerated	twice or more per day	predominantly veg	non-science	SDM
757	18	2	male	Non-science sstream	yes	yes	can't say	pre dinner	while studying	no		no	no		yes	never	yes	17-19 years	non aerated	twice or more per day	predominantly veg	non-science	SDM
758	18	2	females	Non-science sstream	no	no				yes	lunch	no			no	daily	yes	17-19 years	non aerated	twice or more per day	pre dominantly non veg	non-science	SDM
759	18	2	females	Non-science sstream	no	no				no		no	no		yes	weekly	yes	17-19 years	non aerated	twice or more per day	pre dominantly non veg	non-science	SDM
760	19	2	male	Non-science sstream	no	no				no		no	no		yes	weekly	no	17-19 years	non aerated	twice or more per day	pre dominantly non veg	non-science	SDM
761	20	2	male	Non-science sstream	yes	yes	twice a day	tea time	while watching tv	no		yes	yes	tastier	yes	never	yes	20-22 years	aerated	twice or more per day	predominantly veg	non-science	SDM
762	18	2	male	Non-science sstream	yes	yes	twice a day	tea time	while watching tv	yes	lunch	no	yes	to loose weight	yes	daily	yes	17-19 years	non aerated	twice or more per day	pre dominantly non veg	non-science	SDM
763	18	2	male	Non-science sstream	yes	yes	can't say	post dinner	while watching tv	no		no	no		no	never	yes	17-19 years	aerated	twice or more per day	predominantly veg	non-science	SDM
764	18	2	male	Non-science sstream	yes	yes	twice a day	pre dinner	while studying	yes	lunch	no	no		yes	daily	yes	17-19 years	non aerated	twice or more per day	pre dominantly non veg	non-science	SDM
765	18	2	male	Non-science sstream	yes	yes	thrice a day	tea time	while studying	yes	breakfast	no	yes		yes	weekly	yes	17-19 years	non aerated	twice or more per day	pre dominantly non veg	non-science	SDM
766	18	2	females	Non-science sstream	no	no				no		no	no		no	never	no	17-19 years	non aerated	twice or more per day	predominantly veg	non-science	SDM
767	18	2	male	Non-science sstream	no	no				yes	lunch	no	yes	tastier	yes	daily	yes	17-19 years	aerated	twice or more per day	pre dominantly non veg	non-science	SDM
768	19	2	male	Non-science sstream	yes	yes	once a day	tea time	while studying	yes	breakfast	no	yes	more convenient	yes	weekly	yes	17-19 years	non aerated	once a day	predominantly veg	non-science	SDM
769	19	2	male	Non-science sstream	yes	yes	once a day	tea time	while watching tv	no		no	no		yes	never	no	17-19 years	aerated	once a day	pre dominantly non veg	non-science	SDM
770	20	2	male	Non-science sstream	no	no				no		no	no		no	weekly	no	20-22 years	non aerated	twice or more per day	pre dominantly non veg	non-science	SDM
771	18	2	females	Non-science sstream	no	no				no		no	no		yes	weekly	no	17-19 years	non aerated	twice or more per day	pre dominantly non veg	non-science	SDM
772	18	2	male	Non-science sstream	yes	yes	can't say	post dinner	while watching tv	yes	lunch	no	no		no	never	yes	17-19 years	aerated	twice or more per day	predominantly veg	non-science	SDM
773	18	2	male	Non-science sstream	no	no				yes	lunch	no	no		no	daily	yes	17-19 years	non aerated	once a day	predominantly veg	non-science	SDM
774	19	2	male	Non-science sstream	yes	yes	once a day	tea time	while studying	yes	dinner	no	no		yes	daily	yes	17-19 years	aerated	once a day	pre dominantly non veg	non-science	SDM
775	18	2	male	Non-science sstream	yes	yes	twice a day	tea time	others	yes	breakfast	no	yes	tastier	no	never	yes	17-19 years	aerated	twice or more per day	pre dominantly non veg	non-science	SDM
776	18	2	male	Non-science sstream	yes	yes	can't say	tea time	while watching tv	no		no	yes	tastier	no	weekly	no	17-19 years	aerated	twice or more per day	predominantly veg	non-science	SDM
777	18	2	male	Non-science sstream	yes	yes	can't say	tea time	while studying	no		no	yes	tastier	yes	daily	no	17-19 years	aerated	twice or more per day	pre dominantly non veg	non-science	SDM
778	19	2	male	Non-science sstream	yes	yes	can't say	tea time	while studying	yes	breakfast	yes	yes	tastier	no	daily	yes	17-19 years	aerated	twice or more per day	pre dominantly non veg	non-science	SDM
779	18	2	females	Non-science sstream	yes	yes	can't say	tea time	while watching tv	yes	dinner	no	yes	tastier	yes	daily	yes	17-19 years	non aerated	twice or more per day	predominantly veg	non-science	SDM
780	18	2	females	Non-science sstream	yes	yes	once a day	tea time	while watching tv	yes	breakfast	yes	yes	tastier	yes	weekly	yes	17-19 years	non aerated	once a day	pre dominantly non veg	non-science	SDM
781	18	2	females	Science stream	no	no				yes	dinner	no	no		yes	weekly	yes	17-19 years	aerated	twice or more per day	pre dominantly non veg	science	SDM
782	18	2	females	Science stream	no	no				no		no	no		yes	weekly	yes	17-19 years	non aerated	twice or more per day	predominantly veg	science	SDM
783	18	2	females	Science stream	yes	yes	twice a day	post dinner	others	yes	dinner	yes	no		yes	weekly	yes	17-19 years	non aerated	twice or more per day	predominantly veg	science	SDM
784	18	2	females	Science stream	no	no				no		no	no		no	daily	yes	17-19 years	aerated	twice or more per day	predominantly veg	science	SDM
785	18	2	females	Science stream	no	no				no		no	no		no	daily	yes	17-19 years	non aerated	twice or more per day	predominantly veg	science	SDM
786	18	2	females	Science stream	no	no				no		no	no		no	weekly	yes	17-19 years	non aerated	once a day	predominantly veg	science	SDM
787	19	2	females	Science stream	yes	yes	can't say	tea time	while watching tv	no		yes	no		yes	never	no	17-19 years	non aerated	twice or more per day	predominantly veg	science	SDM
788	18	2	females	Science stream	no	no				no		no	no		yes	weekly	yes	17-19 years	non aerated	twice or more per day	predominantly veg	science	SDM
789	19	2	females	Science stream	yes	yes	can't say	pre dinner	while studying	yes	dinner	no	yes	to loose weight	yes	never	no	17-19 years	aerated	twice or more per day	pre dominantly non veg	science	SDM
790	19	2	females	Science stream	yes	yes	can't say	tea time	while studying	yes	breakfast	no	no		yes	weekly	no	17-19 years	aerated	twice or more per day	pre dominantly non veg	science	SDM
791	18	2	females	Science stream	yes	yes	can't say	tea time	while watching tv	yes	dinner	no	yes	tastier	yes	never	no	17-19 years	non aerated	twice or more per day	predominantly veg	science	SDM
792	19	2	females	Science stream	yes	yes	twice a day	tea time	while watching tv	yes	breakfast	no	yes	tastier	no	never	yes	17-19 years	non aerated	twice or more per day	predominantly veg	science	SDM
793	19	2	male	Science stream	yes	yes	can't say	tea time	others	no		no	no		yes	daily	yes	17-19 years	non aerated	twice or more per day	predominantly veg	science	SDM
794	19	2	male	Science stream	no	no				no		no	no		yes	weekly	yes	17-19 years	aerated	once a day	pre dominantly non veg	science	SDM
795	19	2	male	Science stream	no	no				no		no	no		yes	weekly	yes	17-19 years	non aerated	once a day	pre dominantly non veg	science	SDM
796	18	2	male	Science stream	yes	yes	once a day	tea time	while watching tv	no		no	yes	tastier	no	daily	yes	17-19 years	non aerated	once a day	pre dominantly non veg	science	SDM
797	18	2	females	Science stream	yes	yes	once a day	tea time	hanging out with frds	no		no	no		yes	weekly	yes	17-19 years	aerated	once a day	pre dominantly non veg	science	SDM
798	18	2	females	Science stream	no	no				yes	dinner	no	yes	to loose weight	yes	weekly	yes	17-19 years	non aerated	twice or more per day	predominantly veg	science	SDM
799	18	2	females	Science stream	no	no				no		yes	yes	tastier	no	never	yes	17-19 years	non aerated	twice or more per day	pre dominantly non veg	science	SDM
800	18	2	females	Science stream	yes	yes	can't say	tea time	hanging out with frds	no		no	no		yes	never	yes	17-19 years	non aerated	twice or more per day	pre dominantly non veg	science	SDM
801	19	2	male	Science stream	yes	yes	once a day	tea time	while studying	no		no	no		no	weekly	no	17-19 years	non aerated	once a day	pre dominantly non veg	science	SDM
802	18	2	male	Science stream	yes	yes	can't say	tea time	while studying	no		yes	yes	tastier	yes	never	no	17-19 years	non aerated	twice or more per day	pre dominantly non veg	science	SDM
803	18	2	male	Science stream	yes	yes	can't say	tea time	hanging out with frds	no		no	yes	tastier	no	never	yes	17-19 years	non aerated	twice or more per day	pre dominantly non veg	science	SDM
804	18	2	male	Science stream	yes	yes	can't say	tea time	hanging out with frds	no		no	yes	tastier	yes	daily	yes	17-19 years	non aerated	twice or more per day	pre dominantly non veg	science	SDM
805	18	2	male	Science stream	yes	yes	can't say	tea time	while watching tv	yes	breakfast	no	yes	more convenient	no	never	yes	17-19 years	aerated	twice or more per day	predominantly veg	science	SDM
806	18	2	male	Science stream	no	no				no		no	yes	tastier	no	daily	yes	17-19 years	non aerated	once a day	predominantly veg	science	SDM
807	18	2	male	Science stream	yes	yes	can't say	tea time	while watching tv	no		no	no		yes	daily	yes	17-19 years	non aerated	twice or more per day	pre dominantly non veg	science	SDM
808	18	2	male	Science stream	no	no				no		no	no		no	daily	yes	17-19 years	aerated	twice or more per day	pre dominantly non veg	science	SDM
809	18	2	male	Science stream	yes	yes	can't say	pre dinner	while watching tv	no		no	yes	tastier	yes	daily	yes	17-19 years	non aerated	twice or more per day	pre dominantly non veg	science	SDM
810	18	2	male	Science stream	yes	yes	twice a day	tea time	while watching tv	yes	dinner	no	yes	tastier	yes	daily	yes	17-19 years	non aerated	twice or more per day	predominantly veg	science	SDM
811	18	2	male	Science stream	no	no				no		no	yes	tastier	yes	never	yes	17-19 years	aerated	twice or more per day	pre dominantly non veg	science	SDM
812	18	2	male	Science stream	no	no				no		no	no		yes	daily	yes	17-19 years	non aerated	twice or more per day	predominantly veg	science	SDM
813	18	2	male	Science stream	yes	yes	can't say	tea time	others	no		no	yes	tastier	no	never	yes	17-19 years	aerated	twice or more per day	pre dominantly non veg	science	SDM
814	18	2	male	Science stream	no	no				no		no	no		no	never	no	17-19 years	non aerated	once a day	pre dominantly non veg	science	SDM
815	18	2	male	Science stream	no	no				no		yes	no		yes	never	no	17-19 years	non aerated	once a day	pre dominantly non veg	science	SDM
816	18	2	male	Science stream	yes	yes	twice a day	mid morning	others	no		no	no		yes	daily	yes	17-19 years	non aerated	twice or more per day	predominantly veg	science	SDM
817	18	2	male	Science stream	yes	yes	can't say	tea time	while watching tv	no		no	yes	tastier	yes	never	yes	17-19 years	aerated	twice or more per day	pre dominantly non veg	science	SDM
818	20	2	male	Science stream	yes	yes	can't say	tea time	others	no		no	no		no	never	no	20-22 years	non aerated	twice or more per day	pre dominantly non veg	science	SDM
819	18	2	male	Science stream	no	no				no		no	no		yes	never	no	17-19 years	non aerated	once a day	predominantly veg	science	SDM
820	18	2	male	Science stream	no	no				no		no	yes	tastier	yes	daily	yes	17-19 years	non aerated	once a day	predominantly veg	science	SDM
821	18	2	male	Science stream	yes	yes	can't say	tea time	while watching tv	yes	lunch	no	yes	tastier	yes	never	yes	17-19 years	aerated	twice or more per day	pre dominantly non veg	science	SDM
822	18	2	male	Science stream	no	no				no		no	yes	tastier	yes	never	yes	17-19 years	non aerated	twice or more per day	pre dominantly non veg	science	SDM
823	18	2	females	Non-science sstream	yes	yes	twice a day	tea time	while studying	yes	lunch	no	yes	tastier	no	never	yes	17-19 years	aerated	twice or more per day	pre dominantly non veg	non-science	SDM
824	18	2	females	Non-science sstream	yes	yes	twice a day	tea time	hanging out with frds	yes	lunch	no	yes	tastier	yes	never	yes	17-19 years	aerated	twice or more per day	pre dominantly non veg	non-science	SDM
825	18	2	females	Non-science sstream	yes	yes	twice a day	mid morning	while watching tv	no		no	no		yes	never	yes	17-19 years	non aerated	twice or more per day	pre dominantly non veg	non-science	SDM
826	18	2	females	Non-science sstream	yes	yes	once a day	tea time	while studying	yes	lunch	no	yes	tastier	yes	weekly	yes	17-19 years	aerated	once a day	pre dominantly non veg	non-science	SDM
827	18	2	females	Non-science sstream	no	no				yes	lunch	no	yes	more convenient	yes	never	yes	17-19 years	aerated	twice or more per day	pre dominantly non veg	non-science	SDM
828	19	2	females	Non-science sstream	yes	yes	once a day	tea time	while watching tv	no		no	yes	tastier	no	never	yes	17-19 years	non aerated	once a day	pre dominantly non veg	non-science	SDM
829	18	2	females	Non-science sstream	no	no				yes	breakfast	yes	no		yes	never	yes	17-19 years	non aerated	twice or more per day	pre dominantly non veg	non-science	SDM
830	18	2	females	Non-science sstream	no	no				yes	breakfast	no	no		yes	never	yes	17-19 years	non aerated	twice or more per day	pre dominantly non veg	non-science	SDM
831	18	2	females	Non-science sstream	no	no				yes	lunch	yes	yes	tastier	yes	weekly	yes	17-19 years	aerated	twice or more per day	pre dominantly non veg	non-science	SDM
832	18	2	females	Non-science sstream	yes	yes	once a day	tea time	while watching tv	yes	breakfast	no	yes	tastier	yes	weekly	yes	17-19 years	non aerated	once a day	pre dominantly non veg	non-science	SDM
833	19	2	females	Non-science sstream	yes	yes	can't say	tea time	while watching tv	yes	lunch	no	yes	tastier	yes	weekly	yes	17-19 years	non aerated	twice or more per day	pre dominantly non veg	non-science	SDM
834	19	2	females	Non-science sstream	yes	yes	can't say	tea time	while watching tv	yes	lunch	no	yes	tastier	yes	weekly	yes	17-19 years	aerated	twice or more per day	pre dominantly non veg	non-science	SDM
835	19	2	females	Non-science sstream	yes	yes	can't say	tea time	hanging out with frds	yes	breakfast	no	yes	tastier	yes	weekly	yes	17-19 years	aerated	twice or more per day	pre dominantly non veg	non-science	SDM
836	18	2	females	Non-science sstream	no	no				yes	dinner	no	yes	more convenient	yes	never	no	17-19 years	non aerated	once a day	predominantly veg	non-science	SDM
837	18	2	females	Non-science sstream	no	no				yes	lunch	no	no		yes	weekly	yes	17-19 years	non aerated	twice or more per day	predominantly veg	non-science	SDM
838	18	2	male	Non-science sstream	no	no				yes	lunch	no	yes	tastier	no	daily	yes	17-19 years	non aerated	once a day	predominantly veg	non-science	SDM
839	18	2	male	Non-science sstream	no	no				yes	lunch	no	yes	tastier	no	weekly	yes	17-19 years	non aerated	twice or more per day	predominantly veg	non-science	SDM
840	19	2	females	Non-science sstream	no	no				no		no	no		yes	daily	yes	17-19 years	non aerated	once a day	predominantly veg	non-science	SDM
841	18	2	females	Non-science sstream	no	no				no		no	yes	tastier	yes	weekly	yes	17-19 years	non aerated	twice or more per day	predominantly veg	non-science	SDM
842	18	2	females	Non-science sstream	yes	yes	thrice a day	tea time	hanging out with frds	yes	breakfast	no	yes	tastier	yes	never	yes	17-19 years	non aerated	twice or more per day	pre dominantly non veg	non-science	SDM
843	19	2	females	Non-science sstream	no	no				yes	lunch	yes	no		yes	weekly	yes	17-19 years	non aerated	twice or more per day	predominantly veg	non-science	SDM
844	18	2	females	Non-science sstream	yes	yes	twice a day	tea time	hanging out with frds	yes	breakfast	yes	no		yes	never	yes	17-19 years	non aerated	twice or more per day	pre dominantly non veg	non-science	SDM
845	18	2	females	Non-science sstream	yes	yes	can't say	tea time	while watching tv	yes	dinner	no	yes	tastier	yes	weekly	yes	17-19 years	aerated	twice or more per day	pre dominantly non veg	non-science	SDM
846	18	2	females	Non-science sstream	no	no				yes	dinner	no	yes	tastier	no	weekly	yes	17-19 years	aerated	twice or more per day	pre dominantly non veg	non-science	SDM
847	18	2	females	Non-science sstream	yes	yes	once a day	tea time	while watching tv	no		no	yes	tastier	yes	weekly	yes	17-19 years	non aerated	once a day	pre dominantly non veg	non-science	SDM
848	18	2	females	Non-science sstream	no	no				yes	dinner	no	yes	tastier	no	weekly	yes	17-19 years	non aerated	twice or more per day	pre dominantly non veg	non-science	SDM
849	19	2	females	Non-science sstream	yes	yes	once a day	pre dinner	while watching tv	yes	dinner	no	yes	tastier	yes	daily	yes	17-19 years	aerated	once a day	predominantly veg	non-science	SDM
850	19	2	male	Non-science sstream	yes	yes	twice a day	mid morning	while studying	no		yes	yes	tastier	yes	daily	yes	17-19 years	non aerated	twice or more per day	predominantly veg	non-science	SDM
851	18	2	male	Non-science sstream	yes	yes	twice a day	tea time	while studying	no		no	yes	tastier	yes	weekly	yes	17-19 years	non aerated	twice or more per day	pre dominantly non veg	non-science	SDM
852	18	2	male	Non-science sstream	yes	yes	thrice a day	pre dinner	while watching tv	yes	lunch	no	yes	tastier	no	never	no	17-19 years	aerated	twice or more per day	predominantly veg	non-science	SDM
853	18	2	male	Non-science sstream	yes	yes	twice a day	tea time	while watching tv	yes		no	yes	tastier	yes	weekly	yes	17-19 years	non aerated	twice or more per day	pre dominantly non veg	non-science	SDM
854	18	2	females	Non-science sstream	no	no				yes	breakfast	no	yes	tastier	yes	weekly	yes	17-19 years	aerated	twice or more per day	predominantly veg	non-science	SDM
855	18	2	male	Non-science sstream	yes	yes	twice a day	tea time	while studying	yes	lunch	no	no		yes	daily	yes	17-19 years	aerated	twice or more per day	predominantly veg	non-science	SDM
856	18	2	male	Non-science sstream	yes	yes	twice a day	tea time	while watching tv	yes	lunch	no	yes	tastier	yes	weekly	yes	17-19 years	aerated	twice or more per day	predominantly veg	non-science	SDM
857	19	2	females	Non-science sstream	yes	yes	twice a day	pre dinner	hanging out with frds	yes	lunch	no	yes	tastier	no	weekly	yes	17-19 years	aerated	twice or more per day	predominantly veg	non-science	SDM
858	18	2	male	Non-science sstream	yes	yes	thrice a day	pre dinner	while watching tv	yes	lunch	no	yes	tastier	yes	never	yes	17-19 years	aerated	twice or more per day	predominantly veg	non-science	SDM
859	18	2	females	Non-science sstream	yes	yes	twice a day	post dinner	while watching tv	yes	dinner	yes	yes	tastier	yes	weekly	no	17-19 years	non aerated	twice or more per day	pre dominantly non veg	non-science	SDM
860	20	2	male	Non-science sstream	yes	yes	once a day	tea time	while watching tv	no		yes	yes	to loose weight	yes	daily	yes	20-22 years	non aerated	once a day	predominantly veg	non-science	SDM
861	20	2	male	Non-science sstream	no	no				no		no	yes	tastier	yes	daily	yes	20-22 years	non aerated	twice or more per day	predominantly veg	non-science	SDM
862	19	2	male	Non-science sstream	yes	yes	once a day	tea time	while watching tv	no		no	yes	tastier	yes	weekly	yes	17-19 years	non aerated	once a day	pre dominantly non veg	non-science	SDM
863	19	2	male	Non-science sstream	yes	yes	twice a day	tea time	while studying	no		no	yes	tastier	yes	daily	yes	17-19 years	non aerated	twice or more per day	predominantly veg	non-science	SDM
864	19	2	male	Non-science sstream	no	no				no		no	no	tastier	no	weekly	yes	17-19 years	non aerated	once a day	pre dominantly non veg	non-science	SDM
865	20	2	male	Non-science sstream	no	no				no		no	yes	tastier	yes	daily	no	20-22 years	non aerated	once a day	predominantly veg	non-science	SDM
